# Supplementary material
Source: PubMed Central journal article supplement (PMC6865839)
Supplement: jama-322-1877-s001.pdf [file jama-322-1877-s001.pdf]

1  
2  
3  
4  
5  
6  
7  
8  
9  
10  
11  
  
  
  
  
  
  
  
  
  
  
12  
13  
14  
15  
16  
17  
18  
19  
20  
21  
22  
23  
24  
25  
26  
27  
28  
29  
30

**Protocol**

**PREMOD2**

Premature Infants Receiving Milking or Delayed Cord Clamping: Randomized Controlled Multicenter  
Non-Inferiority Trial

**Sharp IRB number:** 1612901  
**Protocol date (version):** Version 1.4  
1 June, 2017

**PRINCIPAL INVESTIGATOR:**

Anup Katheria, MD  
Sharp Mary Birch Hospital for Women and Newborns  
3003 Health Center Drive  
San Diego, CA 92123  
(P) 858 939-4170

**SPONSOR:**

Eunice Kennedy Shriver National Institute of  
Child Health and Human Development

31  
32**Participating Centers**

| Site # | Institution                                                    | Investigator Name           | Role                        | Contact Information                                                                            |
|--------|----------------------------------------------------------------|-----------------------------|-----------------------------|------------------------------------------------------------------------------------------------|
| 01     | Sharp Mary Birch Hospital for Women & Newborns                 | Anup Katheria               | Site Principal Investigator | <a href="mailto:Anup.katheri@sharp.com">Anup.katheri@sharp.com</a>                             |
| 01     | Sharp Mary Birch Hospital for Women & Newborns                 | Larry Cousins               | Site Co-Investigator        | <a href="mailto:Larry.cousins@sharp.com">Larry.cousins@sharp.com</a>                           |
|        | University of Utah                                             | Michael Varner              | Chair, Steering Committee   | <a href="mailto:michael.varner@hsc.utah.edu">michael.varner@hsc.utah.edu</a>                   |
| 02     | Loma Linda University Children's Hospital                      | Giang Truong                | Site Co-Investigator        | <a href="mailto:GTTruong@llu.edu">GTTruong@llu.edu</a>                                         |
| 02     | Loma Linda University Children's Hospital                      | Shareece Davis-Nelson       | Site Co-Investigator        | <a href="mailto:SHDavis@llu.edu">SHDavis@llu.edu</a>                                           |
| 03     | Magee Women and Infants                                        | Toby Debra Yanowitz, MD, MS | Site Co-Investigator        | <a href="mailto:yanotd@mail.magee.edu">yanotd@mail.magee.edu</a>                               |
| 03     | Magee Women and Infants                                        | Hyagriv Simhan              | Site Co-Investigator        | <a href="mailto:hsimhan@mail.magee.edu">hsimhan@mail.magee.edu</a>                             |
| 04     | Providence/St. Vincent (Oregon)                                | Joseph Kaempf               | Site Co-Investigator        | <a href="mailto:Joseph.Kaempf@providence.org">Joseph.Kaempf@providence.org</a>                 |
| 04     | Providence/St. Vincent (Oregon)                                | Mark Tomlinson              | Site Co-Investigator        | <a href="mailto:Mark.Tomlinson@providence.org">Mark.Tomlinson@providence.org</a>               |
| 05     | University of Alabama                                          | Alan Tita                   | Site Co-Investigator        | <a href="mailto:atita@uabmc.edu">atita@uabmc.edu</a>                                           |
| 05     | University of Alabama                                          | Akila Subramaniam           | Site Co-Investigator        | <a href="mailto:asubramaniam@uabmc.edu">asubramaniam@uabmc.edu</a>                             |
| 05     | University of Alabama                                          | Wally Carlo                 | Site Co-Investigator        | <a href="mailto:wcarlo@peds.uab.edu">wcarlo@peds.uab.edu</a>                                   |
|        | University of Alabama (DCC)                                    | Gary Cutter                 | Site Co-Investigator        | <a href="mailto:cutterg@uab.edu">cutterg@uab.edu</a>                                           |
|        | University of Alabama (DCC)                                    | Jeff Szychowski             | Site Co-Investigator        | <a href="mailto:jszychow@uab.edu">jszychow@uab.edu</a>                                         |
| 06     | University of Alberta (Canada)                                 | Georg Schmolzer             | Site Co-Investigator        | <a href="mailto:georg.schmolzer@me.com">georg.schmolzer@me.com</a>                             |
| 06     | University of Alberta (Canada)                                 | Radha Chari                 | Site Co-Investigator        | <a href="mailto:radha.chari@albertahealthservices.ca">radha.chari@albertahealthservices.ca</a> |
| 07     | University College Cork (Ireland)                              | Eugene Dempsey              | Site Co-Investigator        | <a href="mailto:G.Dempsey@ucc.ie">G.Dempsey@ucc.ie</a>                                         |
| 07     | University College Cork (Ireland)                              | Louise Kenny                | Site Co-Investigator        | <a href="mailto:L.Kenny@ucc.ie">L.Kenny@ucc.ie</a>                                             |
| 08     | University of Ulm (Germany)                                    | Helmut Hummler              | Site Co-Investigator        | <a href="mailto:helmut.hummler@uni-ulm.de">helmut.hummler@uni-ulm.de</a>                       |
| 08     | University of Ulm (Germany)                                    | Frank Reister               | Site Co-Investigator        | <a href="mailto:Frank.reister@uniklinik-ulm.de">Frank.reister@uniklinik-ulm.de</a>             |
|        | See Manual of Operations for complete list of additional sites |                             |                             |                                                                                                |

33

34

## 35 Protocol Summary

|                               |                                                                                                                                                                                                                                                                                                                                                                                                                                                                                                                                                                                                                                                                                                                                                                                                                                                                                                                                                                                                                                                                                                                                                                                                                                                                                                                                                                                                                                                                                                                                                                                                                                              |
|-------------------------------|----------------------------------------------------------------------------------------------------------------------------------------------------------------------------------------------------------------------------------------------------------------------------------------------------------------------------------------------------------------------------------------------------------------------------------------------------------------------------------------------------------------------------------------------------------------------------------------------------------------------------------------------------------------------------------------------------------------------------------------------------------------------------------------------------------------------------------------------------------------------------------------------------------------------------------------------------------------------------------------------------------------------------------------------------------------------------------------------------------------------------------------------------------------------------------------------------------------------------------------------------------------------------------------------------------------------------------------------------------------------------------------------------------------------------------------------------------------------------------------------------------------------------------------------------------------------------------------------------------------------------------------------|
| <b>Study Title</b>            | Premature Infants Receiving Milking or Delayed Cord Clamping: Randomized Controlled Multicenter Non- Inferiority Trial [PREMOD2]                                                                                                                                                                                                                                                                                                                                                                                                                                                                                                                                                                                                                                                                                                                                                                                                                                                                                                                                                                                                                                                                                                                                                                                                                                                                                                                                                                                                                                                                                                             |
| <b>Population</b>             | Premature Infants 23 <sup>0</sup> - 31 <sup>6</sup> weeks gestational age                                                                                                                                                                                                                                                                                                                                                                                                                                                                                                                                                                                                                                                                                                                                                                                                                                                                                                                                                                                                                                                                                                                                                                                                                                                                                                                                                                                                                                                                                                                                                                    |
| <b>Primary Objective</b>      | To compare the incidence of severe IVH and/or death in premature newborns 23 <sup>0</sup> - 31 <sup>6</sup> weeks delivered by C/S receiving UCM to those receiving DCC.                                                                                                                                                                                                                                                                                                                                                                                                                                                                                                                                                                                                                                                                                                                                                                                                                                                                                                                                                                                                                                                                                                                                                                                                                                                                                                                                                                                                                                                                     |
| <b>Aims/Hypotheses</b>        | <p><b><u>Aim 1.</u></b> Compare the incidence of severe IVH and/or death in premature newborns 23<sup>0</sup> - 31<sup>6</sup> weeks GA delivered by C/S receiving Umbilical Cord Milking to those receiving Delayed Cord Clamping.</p> <p><b><i>Hypothesis 1:</i></b> Demonstrate infants in the Infants Receiving Milking (UCM) group are not inferior to the Delayed Cord Clamping (DCC) group with regard to severe IVH and/or death.</p> <p><b><i>Hypothesis 2:</i></b> If H1 is true, demonstrate lower incidence of severe IVH and/or death in UCM infants compared to DCC.</p> <p><b><u>Aim 2.</u></b> Compare the safety and efficacy profiles of premature newborns &lt;32 weeks GA delivered by C/S receiving UCM vs. DCC during their hospitalization and at 24 months corrected age.</p> <p><b><i>Hypothesis 3:</i></b> UCM group will have a decreased need for resuscitation interventions with no difference in bilirubin or polycythemia compared to DCC.</p> <p><b><i>Hypothesis 4:</i></b><br/>In the NIRS sub-study, the UCM group will have improved early cardiac and cerebral hemodynamics in the delivery room and first 24 hours of life compared to DCC.</p> <p><b><i>Hypothesis 5:</i></b> Infants in the UCM group will have improved long term outcomes such as less Neurodevelopmental Impairment (NDI) at 24 months corrected age compared to DCC.</p> <p><b><u>Aim 3 (Exploratory, hypothesis-generating):</u></b> To compare the outcomes of premature newborns 23<sup>0</sup> - 31<sup>6</sup> weeks GA delivered by C/S (from Aims 1 and 2) with those born by vaginal delivery receiving UCM or DCC.</p> |
| <b>Design and Sample Size</b> | This prospective multi-national randomized controlled trial (RCT) is a two-arm parallel design of two alternative approaches of treatment. 1500 infants – 750 Delayed Cord Clamping / 750 Milking                                                                                                                                                                                                                                                                                                                                                                                                                                                                                                                                                                                                                                                                                                                                                                                                                                                                                                                                                                                                                                                                                                                                                                                                                                                                                                                                                                                                                                            |
| <b>Inclusion Criteria</b>     | <ul style="list-style-type: none"> <li>• Infants delivered <u>at 23<sup>0</sup> - 31<sup>6</sup> weeks GA</u> based on ultrasound of the fetus up to 13+6 weeks of gestation, if assisted reproductive technology (ART) resulted in the pregnancy, the ART derived date, if neither then the best obstetric estimate at the time of delivery).</li> <li>• Infants without known major congenital malformations prior to delivery</li> <li>• Multiples (unless monochorionic) will be randomized to same group</li> </ul>                                                                                                                                                                                                                                                                                                                                                                                                                                                                                                                                                                                                                                                                                                                                                                                                                                                                                                                                                                                                                                                                                                                     |

|                                 |                                                                                                                                                                                                                                                                                                                                                                                                                                                                                                                                                                                                                                                               |
|---------------------------------|---------------------------------------------------------------------------------------------------------------------------------------------------------------------------------------------------------------------------------------------------------------------------------------------------------------------------------------------------------------------------------------------------------------------------------------------------------------------------------------------------------------------------------------------------------------------------------------------------------------------------------------------------------------|
| <b>Exclusion Criteria</b>       | <ul style="list-style-type: none"> <li>• Congenital anomalies of newborn</li> <li>• Cardiac defects other than small VSD and PDA</li> <li>• Maternal HIV, Hepatitis B and C</li> <li>• Placenta abruption or previa with active bleeding, cutting through the placenta (Note: Partial abruptions are not excluded)</li> <li>• Cord prolapse</li> <li>• Hydrops</li> <li>• Bleeding Accreta</li> <li>• Monochorionic twins (Di/Mo or Mo/Mo)</li> <li>• Fetal risk or maternal risk for severe compromise at delivery identified by obstetrician or neonatologist</li> <li>• Families unlikely to return for neurodevelopmental testing at 24 months</li> </ul> |
| <b>Efficacy Endpoints</b>       | <p><b>Primary:</b><br/>The rate of severe IVH (grade 3 or 4) or death</p> <p><b>Secondary:</b></p> <ul style="list-style-type: none"> <li>• Incidence of death or neurodevelopmental impairment at 22-26 months corrected gestational age</li> <li>• All Grade Intraventricular Hemorrhage</li> <li>• Severe IVH (Grade 3 or 4)</li> <li>• Hemoglobin/Hematocrit at 4 hours</li> <li>• Incidence of Severe IVH or death in infants &lt;28 weeks gestation</li> <li>• Cerebral StO2 during Resuscitation – Sub-study</li> <li>• Cerebral StO2 in the NICU – Sub-study</li> </ul>                                                                               |
| <b>Safety Evaluations</b>       | Adverse events                                                                                                                                                                                                                                                                                                                                                                                                                                                                                                                                                                                                                                                |
| <b>Statistical Methodology</b>  | See Data Analysis section.                                                                                                                                                                                                                                                                                                                                                                                                                                                                                                                                                                                                                                    |
| <b>Enrollment Period</b>        | 3 years                                                                                                                                                                                                                                                                                                                                                                                                                                                                                                                                                                                                                                                       |
| <b>Study Duration</b>           | 5 years                                                                                                                                                                                                                                                                                                                                                                                                                                                                                                                                                                                                                                                       |
| <b>Webpage</b>                  | <a href="http://www.Premod2.org">http://www.Premod2.org</a>                                                                                                                                                                                                                                                                                                                                                                                                                                                                                                                                                                                                   |
| <b>ClinicalTrials.Gov Trial</b> | NCT03019367                                                                                                                                                                                                                                                                                                                                                                                                                                                                                                                                                                                                                                                   |

36 **Data and Safety Monitoring Board**

|                                   |                                 |
|-----------------------------------|---------------------------------|
| <b>Richard Polin, MD</b>          | Columbia University             |
| <b>Yasser El-Sayed, MD</b>        | Stanford University             |
| <b>John Kinsella, MD</b>          | University of Colorado          |
| <b>Suneet P. Chauhan, MD</b>      | University of Texas-Houston     |
| <b>Maureen Duff, Pharm D.</b>     | Parent/Researcher               |
| <b>Amber Salter-Albright, PhD</b> | Washington University St. Louis |

37 **Steering Committee**

|                           |                           |
|---------------------------|---------------------------|
| <b>Michael Varner, MD</b> | University of Utah; Chair |
| <b>Neil Finer, MD</b>     | Sharp Mary Birch Hospital |
| <b>Anup Katheria, MD</b>  | Sharp Mary Birch Hospital |

38  
39  
40  
41  
42  
43  
44  
45  
46  
47  
48  
49  
50  
51  
52  
53  
54  
55  
56  
57  
58  
59  
60  
61  
62  
63  
64  
65  
66  
67  
68  
69  
70  
71  
72  
73  
74

**Sponsor:** Eunice Kennedy Shriver National Institute of Child Health and Human Development

**Coordinating Investigator**

Anup Katheria, MD  
Sharp Mary Birch Hospital for Women & Newborns  
San Diego, California, USA

75  
76  
77  
78  
79  
80  
81  
82  
83  
84  
85  
86  
87  
88  
89  
90  
91  
92  
93  
94  
95  
96  
97  
98  
99  
100  
101  
102  
103  
104  
105  
106  
107  
108  
109  
110  
111  
112  
113  
114  
115  
116  
117  
118  
119  
120  
121  
122  
123  
124  
125  
126

**Study Overview Diagram**

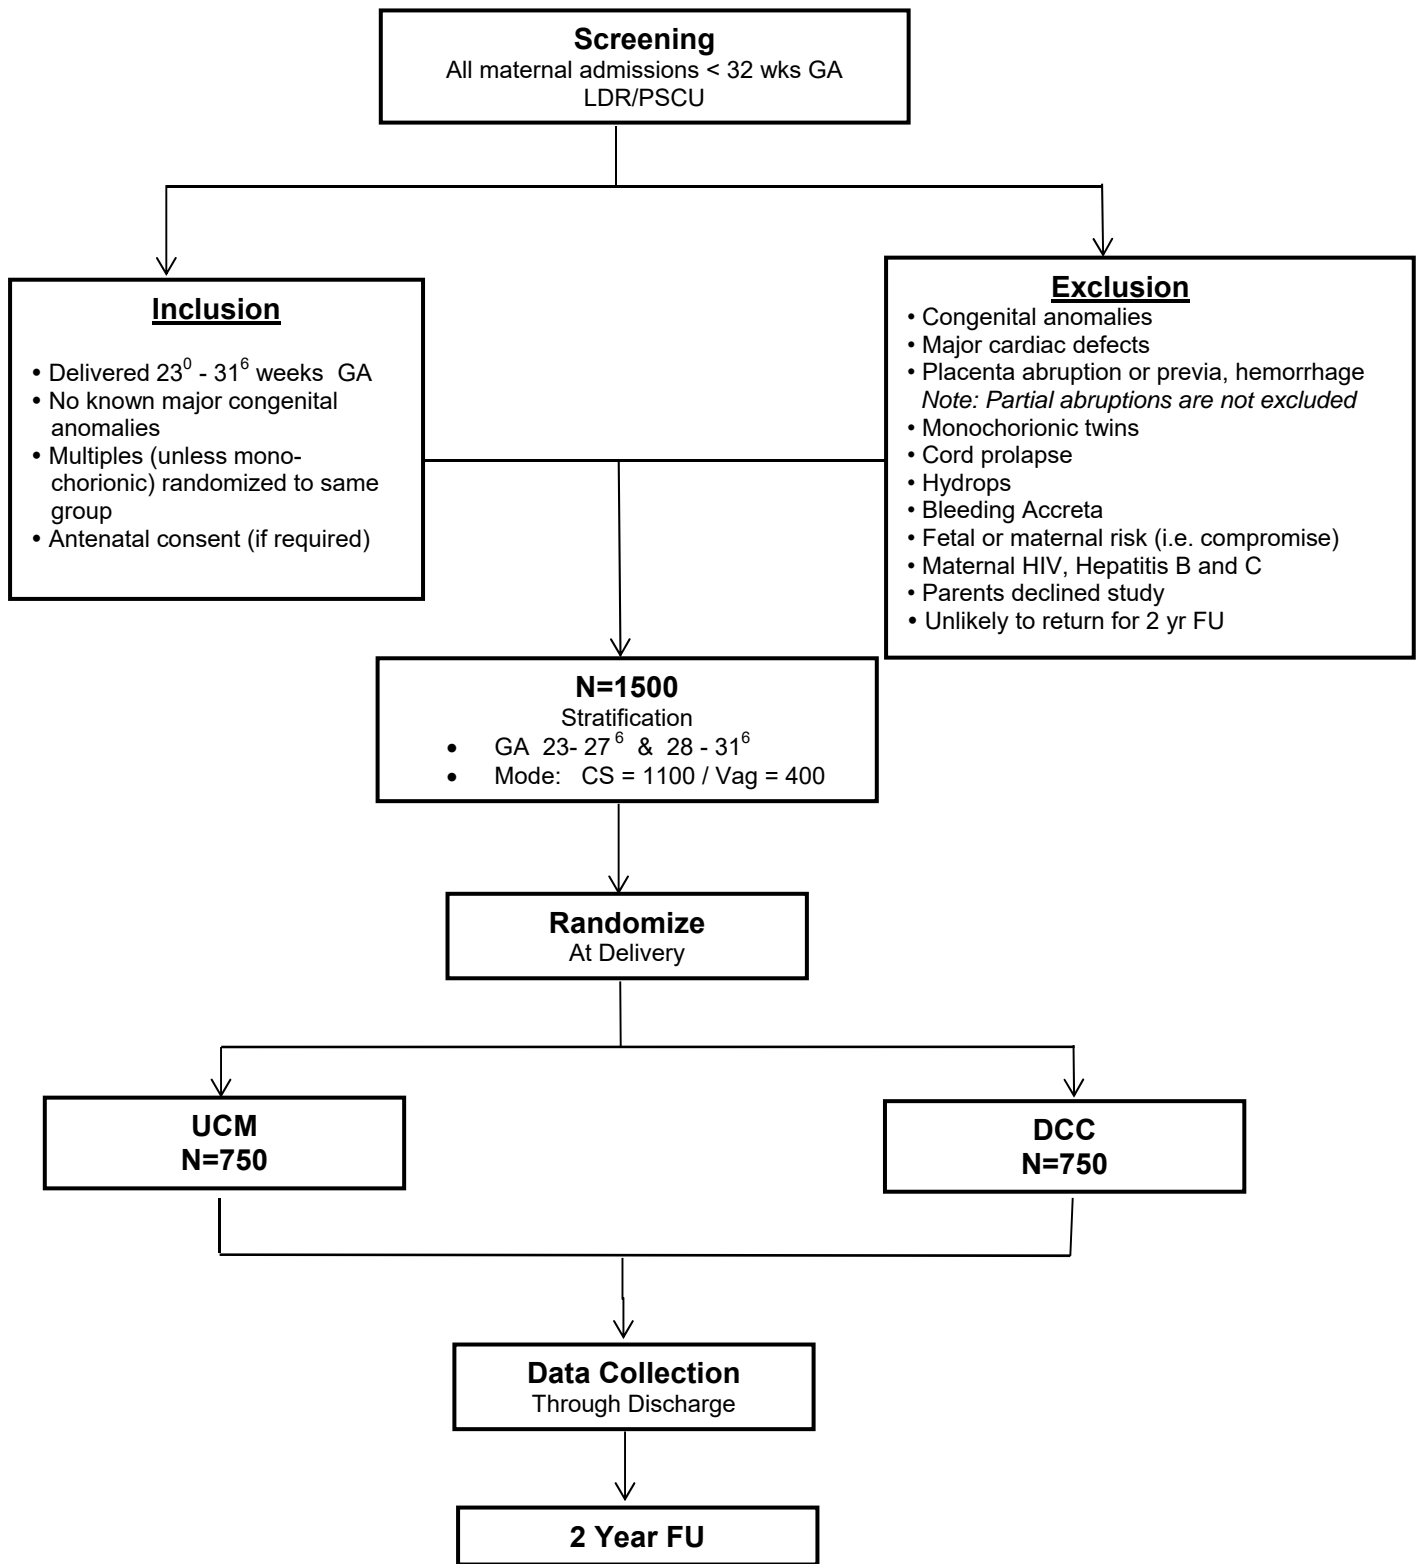

127  
128  
129  
130  
131  
132  
133  
134  
135  
136  
137  
138  
139  
140  
141  
142  
143  
144  
145  
146  
147  
148  
149  
150  
151  
152  
153  
154  
155  
156  
157  
158  
159  
160  
161  
162  
163  
164  
165  
166  
167  
168

**Intervention Flow Diagram**

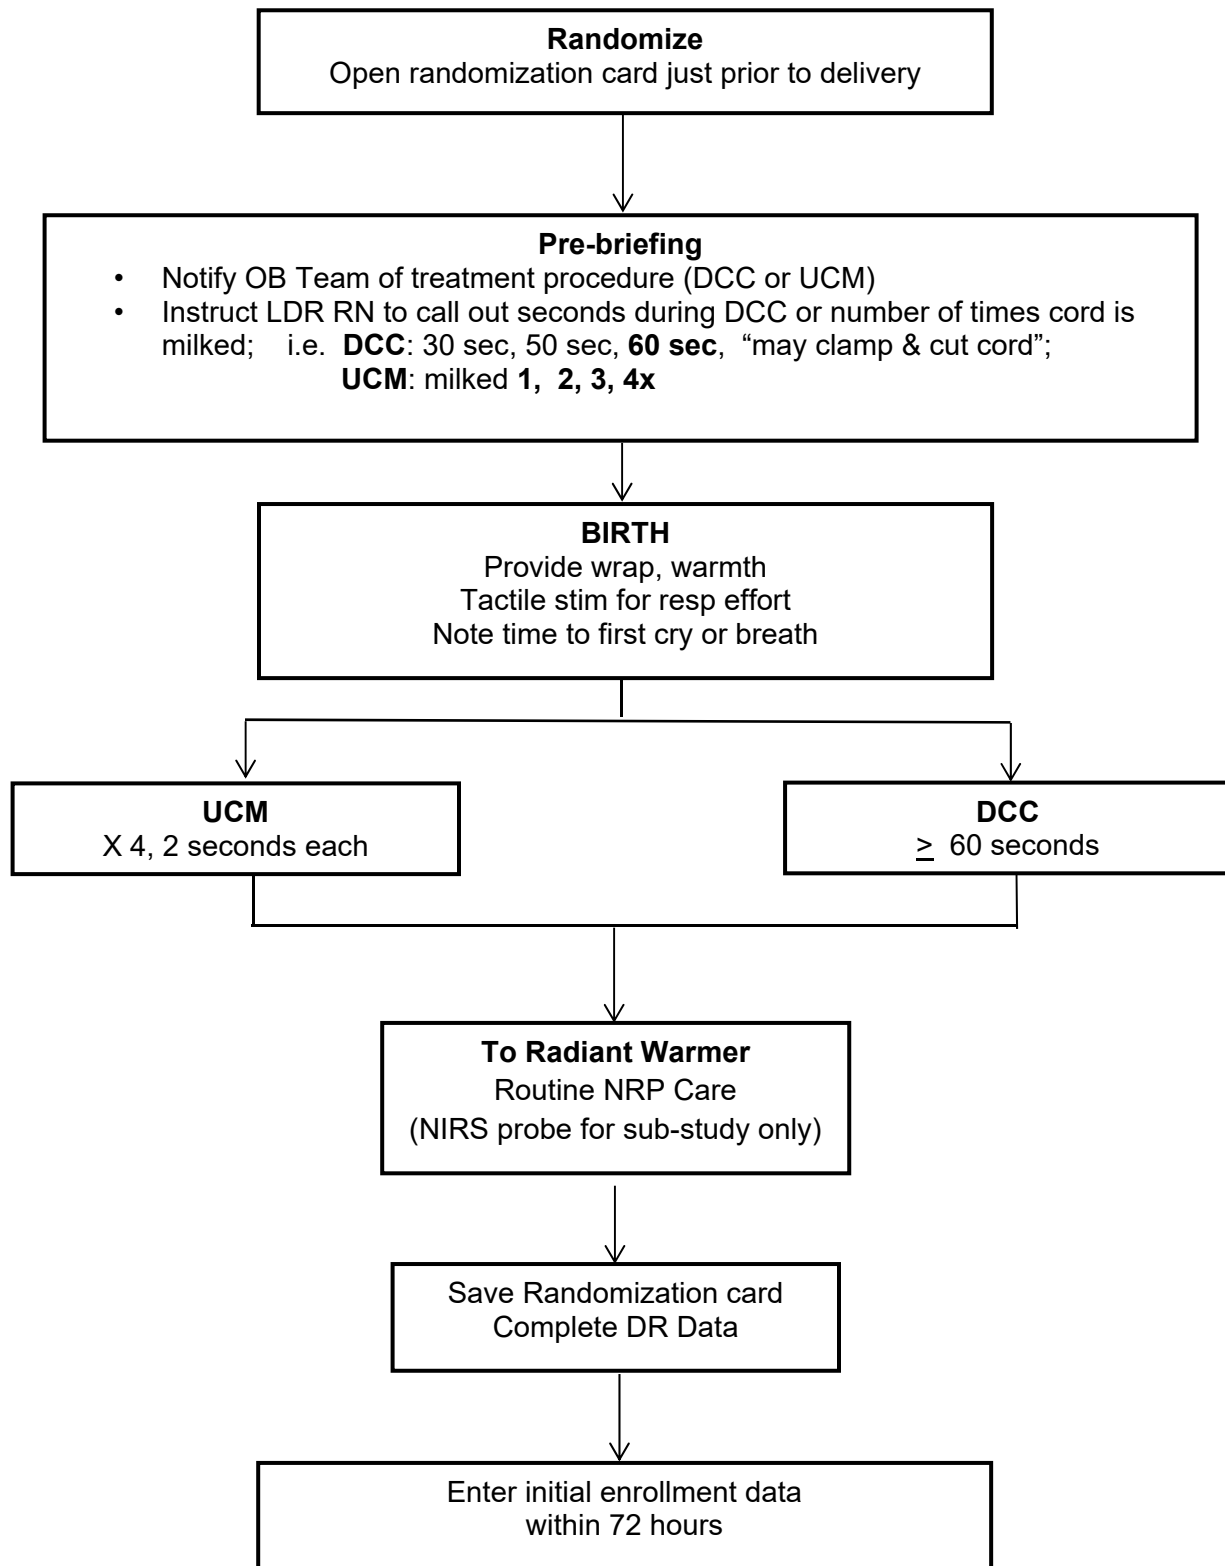

|     |                                                               |           |
|-----|---------------------------------------------------------------|-----------|
| 169 | <b>Table of contents</b>                                      |           |
| 170 | <b><u>PARTICIPATING CENTERS</u></b>                           | <b>2</b>  |
| 171 | <b><u>PROTOCOL SUMMARY</u></b>                                | <b>3</b>  |
| 172 | <b><u>STUDY FLOW DIAGRAM</u></b>                              | <b>6</b>  |
| 173 | <b><u>TABLE OF CONTENTS</u></b>                               | <b>8</b>  |
| 174 | <b><u>LIST OF ABBREVIATIONS</u></b>                           | <b>10</b> |
| 175 | <b><u>BACKGROUND</u></b>                                      | <b>11</b> |
| 176 | <b><u>KNOWLEDGE TO DATE</u></b>                               | <b>11</b> |
| 177 | UCM VS. DCC IN PREMATURE INFANTS                              | 12        |
| 178 | DCC IN PREMATURE NEWBORNS                                     | 13        |
| 179 | IMPORTANCE OF BREATHING                                       | 14        |
| 180 | UCM IN PREMATURE NEWBORNS                                     | 14        |
| 181 | NIRS SUB-STUDY                                                | 15        |
| 182 | <b><u>METHODOLOGY</u></b>                                     | <b>16</b> |
| 183 | ETHICS                                                        | 16        |
| 184 | INCLUSION CRITERIA                                            | 16        |
| 185 | EXCLUSION CRITERIA                                            | 16        |
| 186 | PATIENT DISCONTINUATION AND WITHDRAWAL                        | 17        |
| 187 | SAMPLE SIZE AND POWER CALCULATION                             | 17        |
| 188 | RANDOMIZATION, STRATIFICATION AND ALLOCATION CONCEALMENT      | 18        |
| 189 | BLINDING                                                      | 18        |
| 190 | DESCRIPTION OF GENERAL INTERVENTIONS                          | 18        |
| 191 | <b><u>NIRS SUB-STUDY (N=400)</u></b>                          | <b>19</b> |
| 192 | <b><u>OUTCOME MEASURES</u></b>                                | <b>19</b> |
| 193 | PRIMARY OUTCOME                                               | 19        |
| 194 | SECONDARY OUTCOMES                                            | 19        |
| 195 | <b><u>COMPLIANCE WITH THE PROTOCOL</u></b>                    | <b>20</b> |
| 196 | <b><u>DATA COLLECTION</u></b>                                 | <b>20</b> |
| 197 | <b><u>DATA SECURITY</u></b>                                   | <b>20</b> |
| 198 | <b><u>DATA ANALYSIS</u></b>                                   | <b>20</b> |
| 199 | <b><u>ASSESSMENT OF SAFETY</u></b>                            | <b>22</b> |
| 200 | ADVERSE AND SERIOUS ADVERSE EVENTS                            | 22        |
| 201 | EXPECTED ADVERSE EVENTS                                       | 22        |
| 202 | DEVIATIONS                                                    | 23        |
| 203 | DATA AND SAFETY MONITORING BOARD                              | 23        |
| 204 | SUSPENSION OR EARLY TERMINATION OF THE CLINICAL INVESTIGATION | 24        |



205

|     |                                                                   |           |
|-----|-------------------------------------------------------------------|-----------|
| 206 | <b><u>ETHICAL CONSIDERATIONS</u></b>                              | <b>24</b> |
| 207 | <b>PARENTAL CONSENT</b>                                           | <b>25</b> |
| 208 | <b><u>DATA MANAGEMENT</u></b>                                     | <b>25</b> |
| 209 | <b>DATA HANDLING AND ARCHIVING</b>                                | <b>25</b> |
| 210 | <b><u>TRIAL TIMEFRAME</u></b>                                     | <b>26</b> |
| 211 | <b><u>PUBLICATION PLAN</u></b>                                    | <b>26</b> |
| 212 | <b><u>STATEMENTS OF COMPLIANCE</u></b>                            | <b>26</b> |
| 213 | <b><u>REFERENCES</u></b>                                          | <b>28</b> |
| 214 | <b><u>APPENDIX 1: DATA COLLECTION</u></b>                         | <b>31</b> |
| 215 |                                                                   |           |
| 216 | <b><u>APPENDIX 2: STAFF DELEGATION AND RESPONSIBILITY LOG</u></b> | <b>33</b> |
| 217 |                                                                   |           |
| 218 | <b><u>APPENDIX 3: NIRS SUB-STUDY PROTOCOL</u></b>                 | <b>34</b> |
| 219 | <b><u>APPENDIX 4: SUMMARY OF CHANGES</u></b>                      | <b>35</b> |

220

221 **List of abbreviations**

- 222 ACOG - American College of Obstetricians and Gynecologists  
223 BSID - Bayley Scales of Infant and Toddler Development, Edition 3  
224 DCC - Delayed Cord Clamping  
225 DCoC - Data Coordinating Center, UAB  
226 DSMB - Data and Safety Monitoring Board  
227 EAPM - European Association of Perinatal Medicine  
228 ILCOR - International Liaison Committee on Resuscitation  
229 IVH - Intraventricular Hemorrhage  
230 SAE - Serious Adverse Event  
231 SOGC - Society of Obstetricians and Gynaecologists of Canada  
232 UCM - Umbilical Cord Milking  
233 WHO - World Health Organization

234  
235  
236  
237

**238 Background**

239 Extremely premature infants can experience severe bleeding in the brain, or severe intraventricular  
240 hemorrhage (IVH) which usually occurs within 72 hours after birth. Approximately 65% of all severe  
241 IVH are in infants < 28 weeks gestation, though only 1-2% of overall births are at this gestation. This  
242 has significant public health implications, by causing increased death and long-term morbidities in this  
243 high risk population. The study intervention is poised to understand if we can reduce this burden, and  
244 the trial will provide data on a not yet established therapy. If the strategy is indeed successful,  
245 potential benefits for preterm infants are life-long.

246 The etiology of IVH is multifactorial and is primarily attributed to the intrinsic fragility of the germinal  
247 matrix vasculature and the disturbance of cerebral blood flow. Physiological studies have  
248 demonstrated an association between low blood flow and low blood pressure within the first 24 hours  
249 resulting in the development of IVH and neurological impairment later in childhood. Hence,  
250 stabilization of the germinal matrix vasculature and the maintenance of normal cerebral blood flow on  
251 the first day of life is a potential strategy to reduce severe IVH. Fifty percent of the fetoplacental  
252 circulation resides in the placenta.<sup>1</sup> It seems logical to assume that providing premature newborns with  
253 a sufficient placental transfusion by delaying clamping of the umbilical cord for 30 to 60 seconds would  
254 reduce IVH by improving blood flow at birth. Delayed cord clamping (DCC) has been shown to reduce  
255 overall grades (mainly lower grades 1 and 2) of IVH but has not had an effect on severe IVH (grades 3  
256 and 4). While there may be uncertainty about the long-term outcomes of premature newborns with  
257 low grade IVH, there is a clear need to prevent severe IVH.

258 Recently, we evaluated umbilical cord milking (UCM), a technique which provides a placental  
259 transfusion by grasping the unclamped umbilical cord and pushing blood towards the newborn several  
260 times before the cord is clamped. Our Phase 1 pilot trial (PREMOD: PREmature infants receiving  
261 Milking Or Delayed clamping; n=154) compared UCM to DCC in premature newborns delivered by  
262 C/S and demonstrated that UCM improved blood flow and organ perfusion (as measured by cardiac  
263 ultrasound and improved urine output) by providing a greater placental transfusion (measured by a  
264 higher admission haemoglobin). A meta-analysis has demonstrated benefits in premature newborns,  
265 and a recent survey done by our group has demonstrated that over 50 percent of perinatologists  
266 perform cord milking in premature infants.

**267 Knowledge to date**

268 Severe IVH may be closely related to perinatal hemodynamic changes, including an increase  
269 in the afterload on the left ventricle of the heart after the infant is separated from the placenta.<sup>2</sup> The left  
270 ventricle of a preterm myocardium has limited ability to respond to such an increase in afterload, and

271 this can result in cardiac dysfunction and hemodynamic deterioration. The severity of IVH increases  
272 with decreasing systemic blood flow as measured by superior vena cava (**SVC**) flow.<sup>3,4</sup> Low SVC flow  
273 over the first 24 hours of life (**HOL**) is also significantly associated with an increase in death or survival  
274 with any disability in later childhood. Improving perfusion during this critical time period may reduce or  
275 prevent these serious complications in preterm infants. Delayed umbilical cord clamping (**DCC**) and  
276 umbilical cord milking (**UCM**) have both been shown to maintain optimal blood pressure and systemic  
277 blood flow as measured by SVC flow, when compared to early cord clamping.<sup>5-8</sup> We recently  
278 compared UCM to DCC and demonstrated that infants receiving UCM during Cesarean section (**C/S**)  
279 had higher SVC flow (**PREMOD**).<sup>9</sup> While our trial was not powered to detect a difference in severe IVH  
280 or death, UCM infants had a lower incidence of severe IVH and death compared to DCC infants.

281 A recent Neonatal Research Network (**NRN**) trial compared the neurodevelopmental outcomes  
282 at 18 to 22 months in extremely preterm survivors and found no difference in outcomes between mild  
283 IVH (Grade 1 and 2) and no IVH (Cerebral Palsy 8 vs 9%, Cognitive Impairment 27 vs. 30 percent,  
284  $p=0.92$  and  $0.75$ , respectively).<sup>10</sup> Those with severe IVH (grade 3 and 4) had significantly greater  
285 incidence of cerebral palsy (28%) and NDI (46%),  $p<0.05$ . Bolisetty et al found that even mild IVH may  
286 contribute to increased neurodevelopmental impairment (**NDI**) in extremely premature infants,<sup>11</sup> but  
287 Calisici found no such effect.<sup>12</sup> Despite uncertainty about the long-term outcomes of premature  
288 newborns with low grade IVH, there is a clear need to prevent severe IVH. **Reducing the incidence**  
289 **of severe IVH will have a significant impact on reducing NDI, thus enhancing quality of life.**

290 The inability to reduce the incidence of severe IVH during DCC may reflect an inadequate  
291 placental transfusion for premature newborns delivered by C/S.<sup>13-15</sup> Aladangady et al reported lower  
292 circulating red cell volume with DCC in neonates delivered by C/S compared with vaginal delivery  
293 (**V/D**).<sup>15</sup> They also found that blood volume improved as duration increased up to 60 seconds in infants  
294 with V/D but not C/S delivery. Strauss et al found C/S delivered newborns who received DCC for 60  
295 seconds had decreased red cell volume compared to V/D infants.<sup>13</sup> McDonnell et al failed to show any  
296 difference in hemoglobin levels with a 30-second DCC in those delivered by C/S.<sup>14</sup> **It is important to**  
297 **note that all of these trials comparing DCC to immediate cord clamping after C-section**  
298 **suggested minimal to no transfusion occurred.** The American College of Obstetricians and  
299 Gynecologists (**ACOG**) acknowledges the need for more research regarding the method for a cord  
300 blood transfusion in newborns delivered by C/S.<sup>16</sup> Given the C/S rate of up to 75% for very premature  
301 newborns,<sup>17</sup> it is critical that we determine the optimal method for an adequate placental transfusion  
302 during C/S.

303 UCM vs. DCC in Premature Newborns. Our PREMOD pilot trial demonstrated that UCM at C/S  
304 improved blood flow and organ perfusion by providing a greater placental transfusion, as measured by

305 improved SVC flow (by echocardiography) and higher admission hemoglobin compared to DCC.<sup>9</sup> This  
306 is the first trial to suggest that UCM may be superior to DCC in premature newborns delivered by C/S.  
307 Despite these results and a recent meta-analysis demonstrating a reduction in IVH in premature  
308 newborns with UCM,<sup>18</sup> it has not yet been recommended by any organization for infants of any  
309 gestation because of a cited lack of sufficient evidence.<sup>16,19-22</sup> A recent survey done of perinatologists  
310 revealed that up to 50 percent perform cord milking in premature newborns (Faksh et al, unpublished).  
311 In addition, several centers continue to use cord milking as their exclusive standard of care based on  
312 reduction in morbidities such as death and IVH after implementation of cord milking.<sup>23,24</sup> Thus, there is  
313 an urgent need for Class I evidence comparing DCC and UCM which includes long-term follow-up. If  
314 either of these **simple, no-cost interventions** provide a superior placental transfusion or improve  
315 neonatal outcomes then a large impact on the burden of disability may be realized. **If UCM is found**  
316 **to be non-inferior or superior, it will be preferred due to the lack of delay in resuscitation.**

317 DCC in Premature Newborns. ILCOR and other organizations recommend a 30-60 second  
318 delay in cord clamping during preterm birth.<sup>19,25</sup> Several randomized controlled trials, cohort studies,<sup>26</sup>  
319 and meta-analyses have been published on DCC in premature newborns.<sup>13-15,27-38</sup> Although DCC  
320 decreases the overall incidence of IVH, enthusiasm for DCC is tempered by the lack of benefit for  
321 severe IVH and/or death in addition to the small numbers of newborns included in these trials and  
322 concerns about reporting bias.<sup>39</sup> Recently, the largest DCC trial (n=208) did not show any difference in  
323 severe IVH.<sup>40</sup> The lack of benefit could also reflect the inadequate placental transfusion during DCC  
324 for newborns delivered by C/S. Three trials of DCC vs. immediate cord clamping (**ICC**) stratified by  
325 mode of delivery found no difference in hematocrit levels or tagged red blood cells in newborns  
326 delivered by C/S.<sup>9,41,42</sup> ACOG acknowledges that there are limited data indicating whether DCC  
327 performed during C/S can improve placental transfusion.<sup>43</sup> Various trials have had significant protocol  
328 violations, with 14-22 percent of newborns randomized to DCC actually receiving ICC.<sup>9,40</sup> Two trials  
329 attempted to compensate for this by using cord milking as an alternative method when DCC could not  
330 be performed.<sup>5,8</sup> In a recently published trial DCC was combined with a one-time milking of the  
331 umbilical cord.<sup>40</sup> Our team demonstrated the ability to **minimize protocol violations (<5 percent)** in  
332 our most recently completed trial of delayed cord clamping (Neonatal Resuscitation with Intact Cord  
333 (**NRIC**), n=150). Therefore, we are confident our proposed trial will address and reduce protocol  
334 violations by a number of previously adopted mechanisms, including video recordings and certification  
335 of obstetrical site investigators. The true effect of DCC will not be realized until a definitive trial of UCM  
336 compared to DCC is performed with sufficient power to determine the benefit for infants born by C/S  
337 and to account for contamination and protocol violations using intention to treat and per protocol  
338 analyses.

339 Importance of Breathing. Animal studies and one epidemiological study suggest cord clamping  
 340 should not occur until the newborn is breathing.<sup>44,45</sup> Breathing in premature newborns can be  
 341 established with either positive pressure ventilation or gentle stimulation during DCC. In our feasibility  
 342 trial (NRIC) newborns were randomized to receive DCC with stimulation or ventilation. We found no  
 343 difference between the provision of early continuous positive airway pressure (**CPAP**), positive  
 344 pressure ventilation (**PPV**), or gentle tactile stimulation (rubbing the back) during DCC of 60 seconds.  
 345 However, the median [IQR] time to establish breathing was 16 [10,30] and 19 [7,35] seconds in each  
 346 arm, with over 90 percent of infants establishing breathing prior to cord clamping. These results  
 347 suggest that the provision of gentle tactile stimulation during DCC may hasten the establishment of  
 348 spontaneous respirations and provide a similar placental transfusion compared to CPAP with PPV  
 349 during DCC. The advantage of this approach (stimulation) is that it can be done by a single person  
 350 (often the obstetrician) without the need of respiratory equipment or a neonatal provider. We will  
 351 require that stimulation with DCC is performed to ensure that infants are breathing before the cord is  
 352 clamped.

353 A.4 UCM in Premature Newborns. In UCM the unclamped umbilical cord is grasped and blood  
 354 is pushed toward the infant 4 times before it is  
 355 clamped. This procedure infuses blood into the  
 356 preterm neonate and can be done in 20 seconds,  
 357 equivalent to the time it takes for ICC.<sup>7</sup> We have  
 358 shown in our PREMOD pilot study that UCM yields  
 359 increased systemic blood flow compared to DCC in  
 360 premature newborns delivered by C/S.<sup>9</sup> A recent  
 361 meta-analysis of seven randomized controlled UCM  
 362 trials in premature newborns delivered at <33 weeks  
 363 demonstrated that neonates who undergo UCM have higher hemoglobin (**Hb**) and lower risk for  
 364 chronic lung disease and IVH of all grades compared with those who undergo ICC.<sup>18</sup> **Despite several**  
 365 **meta-analyses on DCC and UCM, the trials and number of events are small. The difference may**  
 366 **be exaggerated due to a possible Type 1 error.**

367 Critics of UCM cite that the cord clamping would occur before the establishment of respirations  
 368 and pulmonary blood flow.<sup>2</sup> However, this may not be correct. UCM improves the pulmonary blood  
 369 flow immediately at birth and the onset of respirations. (**Figure 1**) This has been shown with  
 370 recordings of electrocardiographic changes; newborns who had cord milking had a longer P wave, PR  
 371 and QTC interval when compared with those who had early clamping of the cord.<sup>46</sup> Jaykka et al  
 372 demonstrated that the alveolar patency occurs in response to the filling of the surrounding capillaries,

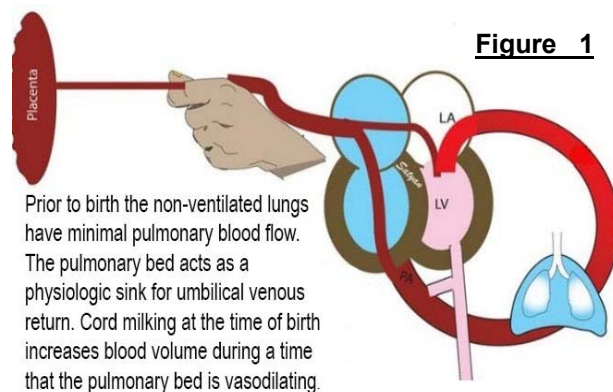

373 which may accelerate onset of respiration.<sup>47</sup> This could explain why UCM may enhance earlier onset  
374 of breathing compared to DCC. In our pilot study there were more infants breathing by the time the  
375 cord was clamped with milking compared to a 45 second DCC (74 vs. 53 percent).<sup>9</sup> Our prior work has  
376 demonstrated that UCM increased heart rate and oxygen saturation within the first 5 minutes of birth  
377 suggesting optimal transition compared to ICC.<sup>7</sup> UCM decreases the number of days on oxygen  
378 therapy and reduced chronic lung disease which may be related to enhanced pulmonary blood flow at  
379 birth. Current published guidelines regarding the management at delivery of premature newborns only  
380 recommend DCC if “the infant does not require resuscitation.” But, it is these unstable newborns who  
381 are at the highest risk of severe IVH and death.<sup>48,49</sup> ***Cord milking may offer an advantage over***  
382 ***DCC in newborns that are deemed too unstable to wait the 30-60 seconds required for DCC.***  
383 UCM can be performed in any low-resource setting and provides adequate placental transfusion to the  
384 premature newborn without delay.

385 We need to establish the safety and efficacy UCM. A pragmatic approach for two similar, but  
386 inadequately tested interventions would be to first demonstrate substantial equivalence or non-  
387 inferiority. Our pilot study provides evidence of superiority. However, a small variation of 4 vs. 6  
388 percent in our primary outcome of death or severe IVH could have significant effects on our estimated  
389 sample size and/or our estimated rates from the pilot trial. If UCM is shown to be non-inferior to DCC,  
390 it will **provide evidence to support a change in guidelines which make UCM on par with DCC,**  
391 **with the additional benefit of providing placental transfusion to infants who need resuscitation.**

392 **The primary objective for this study is to demonstrate infants in the UCM group are not**  
393 **inferior to the Delayed Cord Clamping (DCC) group with regard to severe IVH and/or death.** It is  
394 critical that we employ accurate, delivery specific techniques to provide an adequate placental  
395 transfusion for the premature newborn. DCC at C/S may result in a failure to increase blood volume  
396 resulting in widespread under-perfusion to the organs, especially the brain, of the newly born preterm  
397 infant.<sup>29</sup> If we establish the short and long-term benefits of UCM in a definitive large randomized trial,  
398 we will provide solid evidence to recommend the use of cord milking at the delivery of premature  
399 newborns; potentially resulting in significantly decreased long-term morbidity and costs for this  
400 vulnerable population. This evidence has been called for by national and international organizations  
401 (ILCOR<sup>25</sup>, WHO<sup>19</sup>, SOGC<sup>22</sup>, EAPM<sup>21</sup>, AAP<sup>50</sup>) regarding umbilical cord management in regards to  
402 milking and the need for resuscitation at birth.

403 NIRS Sub-Study. Early hemodynamic effects (within 3 hours of life) of DCC compared to UCM  
404 are still unknown. Four sites experienced in the use of NIRS and who have appropriate data collection  
405 equipment in the delivery room (Alberta, Ulm, Cork and San Diego) will obtain and report the  
406 physiological changes with UCM and DCC from birth until 24 hours of life. This data will yield the

407 largest available sample of continuously recorded heart rate, cerebral tissue oxygenation, peripheral  
408 oxygen saturation, airway pressure, and administered FiO<sub>2</sub> to delineate the short term responses to  
409 two methods of placental transfusion. While there are published data on cerebral oxygenation directly  
410 comparing UCM with DCC, some studies have demonstrated increases in cerebral oxygenation at 4  
411 hours of age with DCC,<sup>51</sup> and a decrease in cerebral oxygenation at birth with DCC compared to  
412 immediate cord clamping.<sup>52</sup> In our initial trial we demonstrated increased blood pressure from 3-15  
413 HOL with UCM compared to DCC in premature newborns <32 weeks, but did not show any  
414 differences in cerebral oxygenation.<sup>9</sup>

## 415 **Methodology**

### 416 **Ethics**

417 This multi-center randomized clinical trial will be reviewed and approved by the appropriate  
418 Research Ethics Committee/IRB at all participating sites. Sites that can, will obtain a waiver for  
419 deferred consent (see parental consent paragraph for details). In circumstances when antenatal  
420 consent was not obtained, sites will explain the cord management procedure performed at delivery,  
421 and request permission to continue monitoring and use information collected for the study.

422

### 423 **Inclusion Criteria**

- 424 • Infants delivered at 23<sup>0</sup> - 31<sup>6</sup> weeks GA based on ultrasound of the fetus up to 13<sup>6</sup> weeks of  
425 gestation, if assisted reproductive technology (ART) resulted in the pregnancy, the ART  
426 derived date, if neither then the best obstetric estimate at the time of delivery).
- 427 • Infants without known major congenital malformations prior to delivery
- 428 • Multiples (unless monochorionic) will be randomized to same group

429

### 430 **Exclusion Criteria**

- 431 • Congenital anomalies of newborn
- 432 • Cardiac defects other than small VSD and PDA
- 433 • Maternal HIV, Hepatitis B and C
- 434 • Placenta abruption or previa with active bleeding, cutting through the placenta  
435 *Note: Partial abruptions are not excluded*
- 436 • Cord prolapse
- 437 • Hydrops
- 438 • Bleeding Accreta
- 439 • Monochorionic twins (Di/Mo or Mo/Mo)
- 440 • Fetal risk or maternal risk for severe compromise at delivery identified by obstetrician or  
441 neonatologist



- 442 • Families unlikely to return for neurodevelopmental testing at 24 months

443 **Patient discontinuation and withdrawal**

444 The participant's parents are free to withdraw the participant from the trial entirely at any time,  
445 and this will not have any consequences for the participant's further treatment. When possible, the  
446 parents will be asked if they will allow their child to participate in the remaining follow-up assessments,  
447 and allow already collected data to be used in a database, a registry, and/or a publication.

448 The attending clinician can withdraw the participant from the trial at any time. The reasons will  
449 be documented. There are no pre-specified criteria for discontinuation of participants from trial. The  
450 discontinuation of participants in the trial will not result in replacement with new participants.

451 **Sample Size and Power calculation**

452 Our initial pilot study of 154 newborns delivered by C/S was recently completed to determine  
453 the feasibility and efficacy of this study and revealed a 6 percent difference in the combined outcomes  
454 of severe IVH/death between newborns treated with UCM and DCC (4.1 vs. 10.1 percent,  
455 respectively). The pilot study was mainly conducted at SMBHWN. However, since severe IVH rates  
456 and death may vary from center to center, we compared our data to the most recent Vermont Oxford  
457 Network (VON) data (over 900 NICUs). For 2015, our center had a severe IVH or death rate of 16  
458 percent, close to the 50th percentile for the VON network. However, this includes very high risk-babies  
459 who would have been excluded from our trial (e.g., di-amniotic monochorionic twins, placental  
460 abruptions, hydrops, and congenital anomalies which have a higher IVH/mortality risk. This likely  
461 explains why our Phase 1 pilot PREMOD study had a lower composite number of severe IVH and/or  
462 death (10.1 percent vs. 4.1 percent, DCC and UCM respectively). We anticipate UCM and DCC  
463 subjects in this trial would have a similar incidence of this outcome.

464 The sample size for non-inferiority testing for infants born by C/S in each group is 502 (overall  
465 sample 1500), a two-group large-sample normal approximation test of proportions with a one-sided  
466 0.05 significance level will have 90% power to reject the null hypothesis that the UCM is inferior to  
467 DCC (the difference in proportions,  $p_{UCM} - p_{DCC}$ , is 0.01 or higher, a 1% non-inferiority margin) in  
468 favor of the alternative hypothesis that the proportions in the two groups are not inferior, assuming that  
469 the expected difference in proportions is -0.04 and the proportion in the DCC group is 0.10. (Note  
470 using 0.101 yields 485, so we round the proportion difference down to be conservative).

471 Further, to show our sample size for C/S is adequate we examined the power to detect the  
472 difference between 0.10 for the DCC group and 0.04 for the UCM arm with 502 newborns per group. A  
473 two group Chi square test with a 0.05 one-sided significance level will have 98% power to detect the  
474 difference between the DCC group proportion,  $p_1$ , of 0.10 and the UCM group proportion,  $p_2$ , of 0.04  
475 (odds ratio of 0.375) when the sample size in each group is 502 and 75% power to show superiority, if

476 the rate is 0.06. Both non-inferiority and superiority will use the same sample and will have the ability  
477 to test two hypotheses in a systematic manner for each aim.

#### 478 **Randomization, Stratification and Allocation Concealment**

479 Pregnant women who are dated by their earliest ultrasound or last menstrual period at <32  
480 weeks gestation will be identified and recruited from the labor and delivery floor or perinatal special  
481 care unit at each site. Parents will be approached and consented prior to delivery when possible. At  
482 sites that have IRB approval for waiver/deferred consent in situations where antenatal consent cannot  
483 be obtained (i.e., imminent delivery), the caregivers will be approached after delivery to use the data  
484 collected, ensuring all subjects receive some form of placental transfusion at birth. Prior to delivery,  
485 the research staff or neonatal delivery team will open the randomization envelope for the proper GA  
486 group. Subjects will be stratified by gestational age and mode of delivery (23<sup>0</sup>-27<sup>6</sup> or 28<sup>0</sup>-31<sup>6</sup> weeks) to  
487 ensure an approximately equal number of infants born at <28 weeks gestation are in each arm.  
488 Multiples will be randomized to the same treatment group for ease of consent and family  
489 considerations. There is no crossover allowed between UCM and DCC groups, subjects should  
490 receive their randomized treatment. If the physician abandons the procedure for the safety of the  
491 mother or infant, they should receive only immediate cord clamping i.e. do not milk the cord if  
492 randomized to DCC.

#### 493 **Blinding/Bias**

494 All potentially eligible newborns between 23<sup>0</sup> to 31<sup>6</sup> weeks GA in-utero will be screened and  
495 logged in order to detect possible selection bias. Randomization will be concealed, preventing  
496 allocation bias. It is impossible to blind either caregivers or parents to the assigned treatment arm.  
497 Documentation of the intervention will not be in the delivery summary portion of the medical record  
498 (i.e. noted as placental transfusion rather than DCC or UCM). In addition all outcome assessments,  
499 whether for primary outcome (interpretation of head ultrasounds) or secondary outcome  
500 (neurodevelopmental exams), will be performed by blinded team members. Ascertainment of severe  
501 IVH will be performed by board certified pediatric radiologists who are blinded to treatment arm.

#### 502 **Description of general interventions**

503 Delayed Cord Clamping - DCC will be performed at C/S by the obstetric team by having the  
504 delivering obstetrician hold the infant below the level of the C/S incision for at least 60 seconds in  
505 warm, sterile towels. Infant may be dried and given gentle tactile stimulation to promote respiratory  
506 effort.

507 For V/D the delivering obstetrician will hold the infant below the level of the introitus for at least  
508 60 seconds in warm sterile towels and gently stimulated if not breathing.

509 Umbilical Cord Milking - UCM will be performed by having the delivering obstetrician hold the  
510 infant below the level of the C/S incision (or below the level of the introitus for V/D) and milk about 20

511 cm of umbilical cord over two seconds, repeating three additional times. This will take about 15  
512 seconds to complete before the obstetrician clamps the umbilical cord. For C/S delivery, the assisting  
513 obstetrician may need to assist by either holding the infant or performing the milking of the cord.

#### 514 Resuscitation

515 Newborns will be resuscitated according to the local unit's protocol.

#### 516 NIRS Sub-study (Appendix 3)

517 This will include a subset of 400 subjects less than 28 weeks gestational age, enrolled in the  
518 primary trial. Four experienced and instrument compatible sites (Alberta, Ulm, Cork and San Diego)  
519 will obtain and report the physiological changes with UCM and DCC from birth until 24 HOL. Once the  
520 newborn has been delivered, received the intervention (UCM or DCC), and been placed on the  
521 resuscitation bed, ECG electrodes, a NIRS sensor [Fore-Sight, (CAS Medical, Branford, CT). and a  
522 pulse oximeter will be placed within 60 seconds. While arterial saturation and heart rate data will be  
523 available to the clinical team, data from NIRS will be blinded. Data on all sub-study infants will be  
524 recorded for at least the first 10 minutes in the delivery room, and then for 24 hours in the NICU. Heart  
525 rate, oxygen saturations, and cerebral oxygenation, will be downloaded as per each site's practice for  
526 neonatal resuscitation. Sharp has used NIRS in the delivery room and operating room for the past 2  
527 years, and the other three sites have been performing this procedure for the past 3 (Edmonton), 10  
528 (Ulm), and 5 (Cork) years. Groups will be stratified by site and NIRS device in analysis and the site  
529 factor examined.

#### 530 **Outcome measures**

##### 531 **Primary outcome**

532 Severe IVH or death

##### 533 **Secondary outcomes**

- 534 • Incidence of death or neurodevelopmental impairment at 22-26 months corrected  
535 gestational age
- 536 • Death prior to discharge
- 537 • All grade IVH
- 538 • Severe IVH (grade 3 or 4)
- 539 • Incidence of severe IVH or death in infants <28 weeks gestation
- 540 • Hemoglobin/Hematocrit at 4 hours of life (infant)
- 541 • Cerebral StO<sub>2</sub> in the first 10 minutes of life (Sub-study, Appendix 3)
- 542 • Cerebral StO<sub>2</sub> in the first 24 hours of life (Sub-study, Appendix 3)
- 543 • Other exploratory and safety secondary outcomes are listed in Appendix 1

**544 Compliance with the Protocol**

545 The clinical investigation will be conducted in compliance with this protocol. Modifications to  
546 the protocol will not be implemented before agreement from the sponsor and relevant ethics  
547 committee approvals are obtained.

548 Investigators are not allowed to deviate from the protocol. Any serious or safety related  
549 deviation will be recorded, summarized and monitored.

**550 Data collection**

551 Infants will be recruited over a period of 36 months or until the requisite sample size is  
552 achieved, whichever is earlier. Approximately another six months will be required to collect hospital  
553 data on all infants enrolled. Resuscitation data will be documented on the randomization card at the  
554 time of delivery. Other medical data on each infant will be collected on an electronic Case Report  
555 Forms (eCRF). The eCRF will be designed in collaboration with University of Alabama, Birmingham.  
556 Upon enrollment, initial subject randomization allocation and GA should be entered into the electronic  
557 database within 72 hours. Trial completion data will be entered from each site within one week after  
558 discharge or death of an infant. All information entered into this database will be used for analysis.

**559 Data Security**

560 Access to direct identifiers will be limited to local clinic staff who meet all relevant training  
561 requirements and are assigned to (or support) this project, and who must have access to these  
562 identifiers for purposes of quality control and monitoring. All investigators, statisticians, and staff will  
563 have completed the Human Subjects Protection training. All data with identifiers will be stored on  
564 firewall-protected secure servers.

**565 Data analysis**

566 All aspects of data management and analyses will be the responsibility of the Data  
567 Coordinating Center (**DCoC**) at UAB working closely with the PREMOD2 Steering Committee as they  
568 have in numerous trials. The DCoC is comprised of three parts: Biostatistics, Data Management and  
569 Information Systems. Together, the DCoC provides statistical collaboration, data management, and  
570 information technology support for the development and conduct of clinical trials. The DCoC will  
571 provide data management and and biostatistical support including centralized randomization, data  
572 monitoring and quality control, interim analyses and statistical monitoring, and publication support.  
573 Data Management will include case report form design, management and entry, data quality  
574 assurance, and reporting. Information Systems will include database design, web based data entry  
575 and system support including the randomization system.

576

577

**578 Primary Analysis**

579 The primary endpoint to be used for efficacy evaluation is the rate of severe IVH (grade 3 or 4)  
580 and/or death. The primary hypothesis to be tested is whether the UCM group results in a non-inferior  
581 event rate compared to the DCC group. The non-inferiority margin is set at 1% (0.01). Although a  
582 proportion's test is used for sample size calculations, rates will be compared using logistic regression,  
583 which will allow for control of covariates, as well as investigation of effect modification. Potential  
584 covariates include gender, gestational age, maternal corticosteroid use, chorioamnionitis,  
585 preeclampsia, and small for gestational age.<sup>40,53-55</sup> A formal statistical analysis plan will be written prior  
586 to database lock. Differential consent practices at sites (antenatal vs. postnatal) may also skew  
587 subject acuity/gestation or maternal complications. Clinical site will be used as a stratifying factor to  
588 control for any confounding by site through residual, site-level treatment imbalance. Standard  
589 regression diagnostics will be used to assess model adequacy and to examine for potential outlying or  
590 influential data points. Since in a non-inferiority trial an intention to treat analysis biases away from the  
591 null, in the per protocol analysis, the covariate of the ordinal scale of the quality of the manipulation for  
592 UCM or DCC will be included. If non-inferiority is established by rejecting that the outcome event rate  
593 is worse by 1% or more in the UCM group, then superiority will be tested at the 5% level following FDA  
594 guidelines. For all superiority testing, the intention to treat analysis will be utilized with a per protocol  
595 analysis as a sensitivity analysis.

596 Prior studies offer no basis for assuming a priori interactions between treatment groups, strata  
597 and subgroups defined by sex, race/ethnicity, gestational age, site or a combination of these groups,  
598 beyond that already controlled for in the randomization. For that reason, preplanned tests for  
599 interactions with treatment assignment are not warranted, and are not powered for with the sample  
600 size. We propose to table all results by subgroups for descriptive purposes and to explore in  
601 secondary analyses possible subgroup differences by treatment group, solely for purposes of  
602 establishing consistency and/or generating hypotheses for future studies.

603

**604 Secondary Analysis**

605 Secondary outcomes will be analyzed using similar procedures to the primary outcome.  
606 Comparisons between treatment groups will use logistic regression (dichotomous outcomes), linear  
607 regression (continuous outcomes), or survival analysis (survival time outcomes, such as time to  
608 discharge, etc.), as appropriate. Differential practices at sites (criteria for phototherapy or blood  
609 transfusions) may also skew these secondary outcomes. Therefore, the clinical site will be used as a  
610 stratifying factor to control for any confounding by site through residual, site-level treatment imbalance.  
611 Neurodevelopmental follow-up results will be assessed using ANCOVA models with covariates used

612 for analyses of the primary outcome. BSID-III scaled and composite cognitive, language and motor  
613 scores will be compared.

#### 614 **Assessment of safety**

615 The study will be closely monitored for issues of data quality, study conduct, adherence to the  
616 prescribed recruitment and treatment procedures, data quality, and adverse events. These analyses  
617 will be presented to the DSMB. Interim analyses as determined by the DSMB, will seek to identify  
618 results that are sufficiently extreme and precise to offset the goal of obtaining additional data that  
619 might lead to more precise results, as well as information about differences in treatment effect by  
620 subgroups of patients.<sup>56</sup> Determinations on stopping must reflect ethical considerations of the impact  
621 of interim results on clinical equipoise as well as considerations on the potential impact (or lack of  
622 impact) of interim results on clinical practice.(98) As a non-inferiority trial, early termination would likely  
623 be the result of unexpected safety concerns and not efficacy. The superiority must be tested in the  
624 context of this non-inferiority hypothesis first and then superiority assessed, unless the DSMB is  
625 ethically motivated to stop the trial for superiority, which we do not anticipate.

626 Early stopping based on inferior safety must be based largely on descriptive data and close  
627 examination of adverse events. Given the projected number of subjects, early stopping is unlikely  
628 unless the observed effect of UCM is substantially worse than DCC or there are unexpected adverse  
629 results potentially seen. We recognize an adaptive design has some attractive features to  
630 incrementally enhance the power to obtain a result, but a concern was an increased budget if a  
631 greater sample size is needed. Our goal was to conduct an adequately powered trial without inflating  
632 our budget. Since we already had to seek and secure additional funds outside of NIH to make this  
633 study feasible, this design was not an option given the budget constraints.

634 While it is true that the sample size re-estimation could lead to a smaller sample size, it is  
635 generally unlikely given our non-inferiority approach and assumptions. Our DSMB will be evaluating  
636 the trial at multiple time points. If a smaller sample size would be necessary, this will likely result in a  
637 larger difference and they could recommend stopping the trial for efficacy (or safety) should there be  
638 such a substantial difference in actual event rate of our primary outcome. If the efficacy or safety is  
639 not overwhelming, then not terminating early has benefits in assessments of other outcomes and it  
640 would be preferable not to stop early.

641

#### 642 **Adverse and Serious Adverse Events**

643 **Expected Adverse Events** – captured in data collection **Appendix 1** and reported in DSMB analyses  
644 The following listed adverse events are expected and will be recorded in the electronic database  
645 (DCoC). The DCoC will track and report all adverse events and report to the DSMB every 3 months.

646 The DSMB will report to the Investigators regarding the risks of the study. Safety reports will be  
647 provided to all sites for reporting to their local IRBs.

- 648 1. IVH grade 1-2
- 649 2. Polycythemia, Hct > 65% in first 7 days of life (not requiring treatment)
- 650 3. PVL
- 651 4. Sepsis (early and late onset)
- 652 5. CLD
- 653 6. NEC (stage  $\geq$  2)
- 654 7. Spontaneous Intestinal Perforation
- 655 8. PDA requiring treatment
- 656 9. ROP (retinopathy of prematurity)

657

### 658 **Serious Events**

659 1. The following SAEs will be reported within 72 hours of discovery of the event to UAB DCoC  
660 via fax or email. DCoC will forward all such events to DSMB and PI.

- 661 • Death (maternal or neonatal)
- 662 • Severe IVH – grades III, IV
- 663 • Compressions and/or Epinephrine in Delivery Room
- 664 • Polycythemia requiring exchange transfusion (Hct >65% in first 7 days of life)
- 665 • Hyperbilirubinemia requiring exchange transfusion (during first 7 days of life)

666

667 2. Any **Serious** Unexpected Problem will be reported within 72 hours of discovery to UAB DCoC.  
668 DCoC will forward such events to DSMB and PI.

669

### 670 **Not Serious Unexpected Event**

671

672 Unexpected events that are Not Serious will be reported not more than 14 days after the PI first  
673 learns of the event. DCoC will forward all non-serious unexpected events to the DSMB and PI.

674

### 675 **Protocol Deviations**

676 Deviations will be entered on the Deviation Report Form in the eDES system as they are identified.  
677 Deviations include: a) patient did not receive correct randomized treatment, b) 4 hour H&H labs not  
678 performed between 2-6 hours of life, c) Other, specify. See Manual of Operations for Deviation Form  
679 completion.

680

### 681 **Data and Safety Monitoring Board**

682 A DSMB will be established to: 1) protect all study patients, 2) safeguard the interests of all  
683 study patients, 3) monitor the overall conduct of the trial, 4) advise the investigators in order to protect  
684 the integrity of the trial, and 5) supervise the conduct and analysis of all interim analyses. To this end

685 the DSMB will receive regular reports from the trial on any injuries or adverse events, any  
686 developments that jeopardize the continued success of the trial, and data by which to accomplish the  
687 evaluation of pre-determined early stopping rules. The DCoC will inform the DSMB of all expected and  
688 unexpected adverse events; recruitment will be sent monthly, demographics will be included with the  
689 interim and final safety and efficacy analyses. Interim analyses will be conducted by the DSMB and  
690 the project statisticians, independently from the trial leadership and staff.

691 We have appointed a six member DSMB to work closely with the NICHD using NIH operating  
692 rules. This committee will serve as an independent advisory group to the trial and ultimately to NIH via  
693 the Project Officer and the Director of the NICHD and is required to provide recommendations about  
694 starting, continuing, and stopping the study. There are no conflicts of interest with these individuals,  
695 who are not research collaborators of, and are at separate institutions from the applicants. It will be the  
696 responsibility of the trial investigators to notify the IRB or IRBs involved of any issues that are relative  
697 to patient safety or to early stopping of the study. The electronic data entry system will automatically  
698 notify all appropriate individuals once an SAE is entered into the eDES. The PREMOD2 Steering  
699 Committee will discuss with the DSMB how frequently to review sites at the start-up phase to ensure  
700 safety, consent, and enrollment. The DSMB will meet at least every 6 months during the active trial  
701 period.

#### 702 **Suspension or premature termination of the clinical investigation**

703 Early stopping based on inferior safety and/or inferior efficacy (futility) must be based largely  
704 on descriptive data and close examination of adverse events. With 500 subjects per group at a second  
705 early stopping review (n=1000), and assuming that the UCM Group is actually no worse than DCC,  
706 observed risk in the experimental group would have to be at most 0.5 (risk of death and IVH) to have  
707 80% power to show non- inferior efficacy (with  $\alpha = 0.012$ ). To justify stopping for non-inferior efficacy  
708 and superior safety again will require a substantial observed improvement in the experimental arm at  
709 the second early stopping time. Additional analyses will be presented to the DSMB to ensure  
710 consistency over and above an appropriate p-value for termination. In summary, given the projected  
711 number of patients to be enrolled, early stopping will be unlikely unless the observed effect of UCM is  
712 substantially worse than DCC at the planned early stopping assessment times.

#### 713 **Ethical Considerations**

714 The PREMOD2 trial will be conducted in compliance with the guidelines of the Declaration of  
715 Helsinki in its latest form, the International Conference on Harmonization of Good Clinical Practice  
716 Guidelines. In case of modifications in the study protocol that are not merely of a formal nature but  
717 contain changes pertinent to the study participants, a renewed vote of the ethics committee will be  
718 obtained. If applicable, the patients (parents) will be informed in the patient information and consent



719 form about changes in the terms and conditions of the trial. The trial will only start the randomization of  
720 participants after approvals from the relevant ethics committees have been received.

721

## 722 **Parental consent/waiver**

723 Pregnant women who are dated by their earliest ultrasound or last menstrual period at <32  
724 weeks gestation will be identified and recruited from the labor and delivery floor or perinatal special  
725 care unit at each site. Parents will be approached and consented prior to delivery when possible.  
726 However, obtaining antenatal informed consent for a delivery room study is not always feasible. Our  
727 group demonstrated that antenatal consent excludes many of the sickest newborns because they are  
728 delivered emergently and therefore parents are unavailable for antenatal consent.<sup>57,58</sup> UCM and DCC  
729 are both considered standard practices at our hospital and are left to obstetrician preference. In the  
730 first PREMOD study, the local IRB determined that the trial met minimal risk requirements. When  
731 possible, antenatal consent was obtained. In situations where antenatal consent could not be obtained  
732 (i.e., imminent delivery) consent was obtained after delivery to use the data collected, ensuring all  
733 subjects received some form of placental transfusion at birth.

734 In a one year follow up survey of the PREMOD study, parents did not express any concerns about the  
735 intervention being done prior to obtaining consent. One family refused to have any data collected but  
736 had no issue with their child receiving UCM. Our results are similar to a recent publication from Ayers  
737 et al describing parental attitudes about participating in a cord trial identical to our PREMOD study  
738 (UCM vs. DCC). In our experience, deferred consent allows the provider and/or research staff to  
739 carefully review the study intervention and data collected with the parents after the initial anxiety of  
740 preterm delivery has decreased. We believe this is the correct approach for this trial. Our IRB Chairs  
741 have indicated that a large multicenter trial using similar interventions would be considered for  
742 deferred consent. We do not anticipate all centers will be approved for deferred consent. These  
743 centers will seek consent when mothers are admitted to the hospital with a potential for preterm  
744 delivery in the GA range. We are aware of the notice of proposed rulemaking from the Office of  
745 Human Research Protection requiring the use of a single central IRB for multicenter trials in the United  
746 States and that this may affect our ability to obtain deferred consent at individual sites.

747

## 748 **Data management**

### 749 **Data handling and archiving**

750 Each site will be responsible for maintaining adequate and accurate source documents that support  
751 pertinent study data for each subject. Medical information from the participants medical record (paper  
752 or electronic), delivery room recordings, and study specific case report forms (CRF) will serve as  
753 source documents and entered into the eDES. A web-based eDES will be designed by the Data  
754

755 Coordinating Center (DCoC) at UAB. Data entry into the central database and handling of medical  
756 records is the responsibility of the investigators.

757 After data have been entered into the study database, a system of computerized data  
758 validation checks will be implemented and applied to the database on a regular basis. Queries will be  
759 entered, tracked and resolved through the electronic data capture system directly. The study  
760 database will be updated in accordance with the resolved queries. All changes to the study database  
761 will be documented. After the establishment of a 'clean file', the database will be locked; data will be  
762 stored for statistical analysis at the DCoC at UAB. The trial database will hereafter be kept according  
763 to the respective national laws. After end of trial, the data will be archived for 25 years according to  
764 good clinical practice guideline.

### 765 **Trial timeframe**

| <b>Trial stages</b>                    | <b>Timeframe</b>                                               |
|----------------------------------------|----------------------------------------------------------------|
| Protocol development                   | 2015- November 2016                                            |
| Protocol finalized                     | December 2016                                                  |
| Site determination                     | December 2016, Investigator Meeting                            |
| Sites submit IRB application           | December 2016 – January 2017                                   |
| Finalize contracts and payment methods | January-March 2017                                             |
| Recruitment phase                      | April 2017- April 2020                                         |
| Assessment phase                       | Primary outcome May 2020                                       |
| Analysis                               | 2020 for primary outcome, 2022 for neurodevelopmental outcomes |
| Publication                            | 2020 on primary outcome, 2022 for neurodevelopmental follow-up |

### 766 **Publication plan**

767 The trial will be registered on ClinicalTrial.gov prior to the randomization of the first participant.  
768 Attempts will be sought to publish protocol, all results, positive, neutral, as well as negative, in a peer-  
769 reviewed international journals. Authorship will be determined according to the International  
770 Committee of Medical Journal Editors. Attempts will be made to publish a list of all investigators with  
771 their contributions in all publications.

### 772 **Statements of compliance**

773 The clinical investigation will be conducted in accordance with the ethical principles that have  
774 their origin in the Declaration of Helsinki.

775 The clinical investigation will comply with the relevant national regulations of each participating  
776 medical center, and will not begin until required approvals from ethical committees have been

777 obtained. Additional requirements imposed by the ethical committees will be followed. The clinical  
778 investigation will be conducted in accordance with this protocol.

780

- 781 1. Yao AC, Moinian M, Lind J. Distribution of blood between infant and placenta after birth. *Lancet*  
782 1969;2:871-3.
- 783 2. Hooper SB, Te Pas AB, Lang J, et al. Cardiovascular transition at birth: a physiological sequence.  
784 *Pediatr Res* 2015;77:608-14.
- 785 3. Kluckow M, Evans N. Low superior vena cava flow and intraventricular haemorrhage in preterm  
786 infants. *Arch Dis Child Fetal Neonatal Ed* 2000;82:F188-94.
- 787 4. Hunt RW, Evans N, Rieger I, Kluckow M. Low superior vena cava flow and neurodevelopment at 3  
788 years in very preterm infants. *J Pediatr* 2004;145:588-92.
- 789 5. Sommers R, Stonestreet BS, Oh W, et al. Hemodynamic effects of delayed cord clamping in premature  
790 infants. *Pediatrics* 2012;129:e667-72.
- 791 6. Takami T, Suganami Y, Sunohara D, et al. Umbilical cord milking stabilizes cerebral oxygenation and  
792 perfusion in infants born before 29 weeks of gestation. *The Journal of pediatrics* 2012;161:742-7.
- 793 7. Katheria AC, Leone TA, Woelkers D, Garey DM, Rich W, Finer NN. The effects of umbilical cord  
794 milking on hemodynamics and neonatal outcomes in premature neonates. *J Pediatr* 2014;164:1045-50 e1.
- 795 8. Meyer MP, Mildenhall L. Delayed cord clamping and blood flow in the superior vena cava in preterm  
796 infants: an observational study. *Arch Dis Child Fetal Neonatal Ed* 2012;97:F484-6.
- 797 9. Katheria AC, Truong G, Cousins L, Oshiro B, Finer NN. Umbilical Cord Milking Versus Delayed Cord  
798 Clamping in Preterm Infants. *Pediatrics* 2015;136:61-9.
- 799 10. Payne AH, Hintz SR, Hibbs AM, et al. Neurodevelopmental outcomes of extremely low-gestational-age  
800 neonates with low-grade periventricular-intraventricular hemorrhage. *JAMA Pediatr* 2013;167:451-9.
- 801 11. Bolisetty S, Dhawan A, Abdel-Latif M, Bajuk B, Stack J, Lui K. Intraventricular hemorrhage and  
802 neurodevelopmental outcomes in extreme preterm infants. *Pediatrics* 2014;133:55-62.
- 803 12. Calisici E, Eras Z, Oncel MY, Oguz SS, Gokce IK, Dilmen U. Neurodevelopmental outcomes of  
804 premature infants with severe intraventricular hemorrhage. *The journal of maternal-fetal & neonatal medicine :  
805 the official journal of the European Association of Perinatal Medicine, the Federation of Asia and Oceania  
806 Perinatal Societies, the International Society of Perinatal Obstet* 2014:1-6.
- 807 13. Strauss RG, Mock DM, Johnson K, et al. Circulating RBC volume, measured with biotinylated RBCs, is  
808 superior to the Hct to document the hematologic effects of delayed versus immediate umbilical cord clamping  
809 in preterm neonates. *Transfusion* 2003;43:1168-72.
- 810 14. McDonnell M, Henderson-Smart DJ. Delayed umbilical cord clamping in preterm infants: a feasibility  
811 study. *Journal of paediatrics and child health* 1997;33:308-10.
- 812 15. Aladangady N, McHugh S, Aitchison TC, Wardrop CA, Holland BM. Infants' blood volume in a  
813 controlled trial of placental transfusion at preterm delivery. *Pediatrics* 2006;117:93-8.
- 814 16. Committee Opinion No.543: Timing of umbilical cord clamping after birth. *Obstet Gynecol*  
815 2012;120:1522-6.
- 816 17. Hogberg U, Hakansson S, Serenius F, Holmgren PA. Extremely preterm cesarean delivery: a clinical  
817 study. *Acta Obstet Gynecol Scand* 2006;85:1442-7.
- 818 18. Al-Wassia H, Shah PS. Efficacy and safety of umbilical cord milking at birth: a systematic review and  
819 meta-analysis. *JAMA Pediatr* 2015;169:18-25.
- 820 19. WHO Guidelines Approved by the Guidelines Review Committee. Guidelines on Basic Newborn  
821 Resuscitation. Geneva: World Health Organization.; 2012.
- 822 20. Kattwinkel J, Perlman JM, Aziz K, et al. Neonatal resuscitation: 2010 American Heart Association  
823 Guidelines for Cardiopulmonary Resuscitation and Emergency Cardiovascular Care. *Pediatrics*  
824 2010;126:e1400-13.
- 825 21. Sweet DG, Carnielli V, Greisen G, et al. European consensus guidelines on the management of neonatal  
826 respiratory distress syndrome in preterm infants - 2010 update. *Neonatology* 2010;97:402-17.

- 827 22. Leduc D, Senikas V, Lalonde AB, et al. Active management of the third stage of labour: prevention and  
828 treatment of postpartum hemorrhage. *Journal of obstetrics and gynaecology Canada : JOGC = Journal*  
829 *d'obstetrique et gynecologie du Canada : JOGC* 2009;31:980-93.
- 830 23. Patel S, Clark EA, Rodriguez CE, Metz TD, Abbaszadeh M, Yoder BA. Effect of umbilical cord  
831 milking on morbidity and survival in extremely low gestational age neonates. *Am J Obstet Gynecol*  
832 2014;211:519.e1-7.
- 833 24. Schmid MB, Reister F, Mayer B, Hopfner RJ, Fuchs H, Hummler HD. Prospective risk factor  
834 monitoring reduces intracranial hemorrhage rates in preterm infants. *Deutsches Arzteblatt international*  
835 2013;110:489-96.
- 836 25. Perlman JM, Wyllie J, Kattwinkel J, et al. Part 7: Neonatal Resuscitation: 2015 International Consensus  
837 on Cardiopulmonary Resuscitation and Emergency Cardiovascular Care Science With Treatment  
838 Recommendations. *Circulation* 2015;132:S204-S41.
- 839 26. Kaempf JW, Tomlinson MW, Kaempf AJ, et al. Delayed umbilical cord clamping in premature  
840 neonates. *Obstet Gynecol* 2012;120:325-30.
- 841 27. Mercer JS, McGrath MM, Hensman A, Silver H, Oh W. Immediate and delayed cord clamping in  
842 infants born between 24 and 32 weeks: a pilot randomized controlled trial. *J Perinatol* 2003;23:466-72.
- 843 28. Nelle M, Fischer S, Conze S, Beedgen B, Brischke EM, Linderkamp O. Effects of later cord clamping  
844 on circulation in prematures (Abstract). *Pediatr Res* 1998;44:420.
- 845 29. Narenda A, Beckett CA, T., Kyle E, et al. Is it possible to promote placental transfusion at preterm  
846 delivery? *Pediatr Res* 1998;44:453.
- 847 30. Rabe H, Wacker A, Hulskamp G, Homig-Franz I, Jorch G. Late cord clamping benefits extrauterine  
848 adaptation. *Pediatr Res* 1998;44:454.
- 849 31. Kinmond S, Aitchison TC, Holland BM, Jones JG, Turner TL, Wardrop CA. Umbilical cord clamping  
850 and preterm infants: a randomized trial. *Bmj* 1993;306:172-5.
- 851 32. Ibrahim H, Krouskop R, Lewis D, Dhanireddy R. Placental transfusion: umbilical cord clamping and  
852 preterm infants. *J Perinat* 2000;20:351-54.
- 853 33. Rabe H, Wacker A, Hulskamp G, et al. A randomised controlled trial of delayed cord clamping in very  
854 low birth weight preterm infants. *Eur J Pediatr* 2000;159:775-7.
- 855 34. Mercer JS, Vohr BR, McGrath MM, Padbury JF, Wallach M, Oh W. Delayed cord clamping in very  
856 preterm infants reduces the incidence of intraventricular hemorrhage and late-onset sepsis: a randomized,  
857 controlled trial. *Pediatrics* 2006;117:1235-42.
- 858 35. Oh W, Carlo WA, Fanaroff AA, McDonald S, Donovan EF, Poole K, et al. Delayed cord clamping in  
859 extremely low birth weight infants - a pilot randomized controlled trial. *Pediatr Res* 2002;51:365-6.
- 860 36. Hofmeyr GJ, Bolton KD, Bowen DC, Govan JJ. Periventricular/intraventricular haemorrhage and  
861 umbilical cord clamping. Findings and hypothesis. *S Afr Med J* 1988;73:104-6.
- 862 37. Hofmeyr GJ, Gobetz L, Bex PJ, et al. Periventricular/intraventricular hemorrhage following early and  
863 delayed umbilical cord clamping. A randomized controlled trial. *Online J Curr Clin Trials* 1993;Doc No  
864 110:[2002 words; 26 paragraphs].
- 865 38. Rabe H, Reynolds G, Diaz-Rossello J. Early versus delayed umbilical cord clamping in preterm infants.  
866 *Cochrane Database Syst Rev* 2004:CD003248.
- 867 39. Rabe H, Diaz-Rossello JL, Duley L, Dowswell T. Effect of timing of umbilical cord clamping and other  
868 strategies to influence placental transfusion at preterm birth on maternal and infant outcomes. *Cochrane*  
869 *Database Syst Rev* 2012;8:Cd003248.
- 870 40. Mercer JS, Erickson-Owens DA, Vohr BR, et al. Effects of Placental Transfusion on Neonatal and 18  
871 Month Outcomes in Preterm Infants: A Randomized Controlled Trial. *J Pediatr* 2016;168:50-5.e1.
- 872 41. Krueger MS, Eyal FG, Peevy KJ, Hamm CR, Whitehurst RM, Lewis DF. Delayed cord clamping with  
873 and without cord stripping: a prospective randomized trial of preterm neonates. *Am J Obstet Gynecol*  
874 2015;212:394 e1-5.

- 875 42. Rabe H, Jewison A, Alvarez RF, et al. Milking compared with delayed cord clamping to increase  
876 placental transfusion in preterm neonates: a randomized controlled trial. *Obstetrics and gynecology*  
877 2011;117:205-11.
- 878 43. Raju TN. Committee Opinion No.543: Timing of umbilical cord clamping after birth. *Obstet Gynecol*  
879 2012;120:1522-6.
- 880 44. Bhatt S, Alison BJ, Wallace EM, et al. Delaying cord clamping until ventilation onset improves  
881 cardiovascular function at birth in preterm lambs. *The Journal of physiology* 2013;591:2113-26.
- 882 45. Ersdal HL, Linde J, Mduma E, Auestad B, Perlman J. Neonatal outcome following cord clamping after  
883 onset of spontaneous respiration. *Pediatrics* 2014;134:265-72.
- 884 46. Walsh SZ. Early clamping versus stripping of cord: comparative study of electrocardiogram in neonatal  
885 period. *British Heart Journal* 1969;31:122-6.
- 886 47. Jaykka S. Capillary erection and the structural appearance of fetal and neonatal lungs. *Acta Paediatr*  
887 1958;47:484-500.
- 888 48. Rautonen J, Makela A, Boyd H, Apajasalo M, Pohjavuori M. CRIB and SNAP: assessing the risk of  
889 death for preterm neonates. *Lancet* 1994;343:1272-3.
- 890 49. Dammann O, Naples M, Bednarek F, et al. SNAP-II and SNAPPE-II and the risk of structural and  
891 functional brain disorders in extremely low gestational age newborns: the ELGAN study. *Neonatology*  
892 2010;97:71-82.
- 893 50. Raju. Don't rush to cut the cord. *AAP News* 2013.
- 894 51. Baenziger O, Stolkin F, Keel M, et al. The influence of the timing of cord clamping on postnatal  
895 cerebral oxygenation in preterm neonates: a randomized, controlled trial. *Pediatrics* 2007;119:455-9.
- 896 52. Pichler G, Baik N, Urlesberger B, et al. Cord clamping time in spontaneously breathing preterm  
897 neonates in the first minutes after birth: impact on cerebral oxygenation - a prospective observational study. *The*  
898 *journal of maternal-fetal & neonatal medicine : the official journal of the European Association of Perinatal*  
899 *Medicine, the Federation of Asia and Oceania Perinatal Societies, the International Society of Perinatal Obstet*  
900 2015:1-3.
- 901 53. Linder N, Haskin O, Levit O, et al. Risk factors for intraventricular hemorrhage in very low birth weight  
902 premature infants: a retrospective case-control study. *Pediatrics* 2003;111:e590-5.
- 903 54. Salafia CM, Minior VK, Rosenkrantz TS, et al. Maternal, placental, and neonatal associations with early  
904 germinal matrix/intraventricular hemorrhage in infants born before 32 weeks' gestation. *American journal of*  
905 *perinatology* 1995;12:429-36.
- 906 55. Ment LR, Oh W, Philip AG, et al. Risk factors for early intraventricular hemorrhage in low birth weight  
907 infants. *J Pediatr* 1992;121:776-83.
- 908 56. Hughes MD, Freedman LS, Pocock SJ. The impact of stopping rules on heterogeneity of results in  
909 overviews of clinical trials. *Biometrics* 1992;48:41-53.
- 910 57. Bhatt S, Polglase GR, Wallace EM, Te Pas AB, Hooper SB. Ventilation before Umbilical Cord  
911 Clamping Improves the Physiological Transition at Birth. *Front Pediatr* 2014;2:113.
- 912 58. Rabe H, Jewison A, Alvarez RF, et al. Milking compared with delayed cord clamping to increase  
913 placental transfusion in preterm neonates: a randomized controlled trial. *Obstet Gynecol* 2011;117:205-11.
- 914

- 915 **Appendix 1**  
916 **DATA COLLECTED FROM INFANTS AND**  
917 **MOTHERS**  
918 **Clinical Data collected from all enrolled mothers:**  
919 1. Age  
920 2. Race/Ethnicity  
921 3. Antenatal Steroids (yes/no) (include partial  
922 course)  
923 4. Antenatal Magnesium (yes/no)  
924 5. *Diabetes (gestational, Type 1 or 2) (yes/no)*  
925 6. Chorioamnionitis (yes/no)  
926 7. Hypertension/Pre-eclampsia (yes/no)  
927 8. Rupture of Membranes (hours)  
928 9. *Labor prior to delivery (yes/no)*  
929 10. *Pitocin prior to delivery (yes/no)*  
930 11. *Pitocin prior to cord clamping (yes/no)*  
931 12. *Postnatal uterotonic administration: Methergine,*  
932 *Cytotec, Hemabate (yes/no)*  
933 13. *Retained Placenta (yes/no)*  
934 14. *Indication for Delivery (check all)*  
935 15. *Presentation (vertex, breech, transverse)*  
936 16. Mode of Delivery  
937 17. General Anesthesia (yes/no)  
938 18. Endometritis (y/n)  
939 19. Placental Weight  
940 20. *Need for blood transfusion*  
941 21. *Maternal Hospitalization/Readmit within 10 days*  
942 22. *Length of Stay*  
943 23. *Maternal Death*  
944 **Clinical Data collected from all enrolled infants:**  
945 24. Gestational Age  
946 25. Multiple gestation (yes/no)  
947 26. Gender  
948 27. Birthweight (grams), length (cm), and head  
949 circumference (cm)  
950 28. APGARS at 1 and 5 minutes  
951 29. *Race/Ethnicity*  
952 **Measured Endpoints and Recorded Outcomes**  
953 **Specific Aim 1**  
954 30. Severe IVH or Death (combined outcome)  
955 **Specific Aim 2 (Clinical Outcomes)**  
956 **Intervention (protocol compliance)**  
957 31. *Time of cord clamping (seconds)*  
958 32. *Number of times cord milked*  
959 33. *Breathing or crying prior to cord clamping?*  
960 *(yes/no)*  
961 **Resuscitation Interventions (Toxicity and**  
962 **Efficacy)**  
963 34. Infant's first temperature in delivery room  
964 35. Maximum inspired oxygen (FiO<sub>2</sub>) (percentage)  
965 36. DR Interventions: PPV, CPAP, intubation, chest  
966 compressions, medications (Y/N)  
967 37. Intubation (yes/no) (indicate Delivery Room or  
968 NICU)  
969 38. Surfactant (yes/no) (Delivery Room or NICU)  
970 **Clinical Outcomes (Toxicity and Efficacy)**  
971 39. SGA (<10%)  
972 40. Admission temperature to NICU  
973 41. *Hemoglobin & hematocrit at 4 (±2) hours of life*  
974 42. *Venous and/or arterial cord gas (pH+BE)*  
975 43. *Worst BE on blood gas within 1 hour of life*  
976 44. *Peak total serum bilirubin (mg/dL)*  
977 45. *Polycythemia in the first 7 days of life (Hct >65%)*  
978 46. *Duration of phototherapy days*  
979 47. *CRIB Score of severity of illness*  
980 48. *Urine output on day of life 2 (ml/kg/day)*  
981 49. *Mean arterial BP on admission, 6, 12, 18 & 24 hol*  
982 50. *Use of cardiac inotropes (dopamine, dobutamine,*  
983 *epinephrine) (yes/no)*  
984 51. *Use of postnatal steroids (yes/no) (indicate for*  
985 *blood pressure, extubation or chronic lung*  
986 *disease)*  
987 52. Presence of any intraventricular hemorrhage  
988 (yes/no)  
989 53. Presence of severe intraventricular hemorrhage  
990 (Grade 3 or 4) (yes/no)  
991 54. Presence of PVL, echodense lesions or  
992 ventriculomegaly on any US prior to discharge  
993 (yes/no)  
994 55. Early onset sepsis (positive blood or CSF culture  
995 at ≤ 72 HOL) (yes/no)  
996 56. Late onset sepsis (> 72 HOL) (yes/no)  
997 57. Chronic lung disease (receiving supplemental O<sub>2</sub>  
998 at 36 weeks (yes/no)  
999 58. Duration of intubated and mechanical ventilation  
1000 (days)  
1001 59. Necrotizing Enterocolitis Bell (Stage ≥ 2) (yes/no)  
1002 60. Spontaneous Intestinal Perforations (yes/no)  
1003 61. Retinopathy stage 3 or greater (yes/no)  
1004 62. Patent Ductus Arteriosus requiring treatment  
1005 (medical and/or ligation) (yes/no)  
1006 63. *Need for Blood Transfusion (DOL of 1<sup>st</sup>*  
1007 *transfusion and total number) (yes/no)*  
1008 64. *Hemolytic disease of the Newborn (i.e. Rh, ABO)*  
1009 65. Length of hospitalization (total days)  
1010 66. Death (only)  
1011 67. *Neurodevelopmental Impairment at 24 months:*  
1012 *BSIDIII, cerebral palsy, blindness or deafness*  
1013 **Cerebral and Cardiac Hemodynamic Substudy**  
1014 **(Toxicity and Efficacy)**  
1015 68. Cerebral StO<sub>2</sub> by NIRS from birth until 24 hours of  
1016 life  
1017 69. Maximum inspired oxygen (FiO<sub>2</sub>) during birth  
1018 resuscitation.  
1019 70. Heart Rate from birth until 24 hours of life  
1020 71. Mean blood pressure (at NICU admission) taken  
1021 by either oscillometry (every hour) or indwelling  
1022 arterial line until 24 hours of life

- 1023 72. Oxygen saturation (by oximetry) from birth until 24  
1024 hours of life  
1025 **Specific Aim 3 (Comparison of Cesarean Section**  
1026 **vs Vaginal Deliveries)**  
1027 73. Compare all variables from Aim 1, and 2 in  
1028 vaginal deliveries (UCM and DCC)



029 **Appendix 2: Staff Delegation and Responsibility Log**

030 Premature Infants Receiving Milking or Delayed Cord Clamping: Randomized Controlled Multicenter Non-Inferiority Trial [PREMOD2]

031 IRB# \_\_\_\_\_ Site # \_\_\_\_\_ Principal Investigator: \_\_\_\_\_

032

| Staff Name  |          | Signature | Title<br>(PI, Coord) | Role & Responsibilities | Date<br>Started | Date<br>Terminated | PI<br>Initials/Date |
|-------------|----------|-----------|----------------------|-------------------------|-----------------|--------------------|---------------------|
| Last, First | Initials |           |                      |                         |                 |                    |                     |
|             |          |           |                      |                         |                 |                    |                     |
|             |          |           |                      |                         |                 |                    |                     |
|             |          |           |                      |                         |                 |                    |                     |
|             |          |           |                      |                         |                 |                    |                     |
|             |          |           |                      |                         |                 |                    |                     |
|             |          |           |                      |                         |                 |                    |                     |
|             |          |           |                      |                         |                 |                    |                     |
|             |          |           |                      |                         |                 |                    |                     |
|             |          |           |                      |                         |                 |                    |                     |
|             |          |           |                      |                         |                 |                    |                     |
|             |          |           |                      |                         |                 |                    |                     |
|             |          |           |                      |                         |                 |                    |                     |
|             |          |           |                      |                         |                 |                    |                     |
|             |          |           |                      |                         |                 |                    |                     |

033

034

035

- 1-Subject Recruitment      3-Determine Eligibility      5-AE Assessment      7-Regulatory Documents Maintenance
- 2-Obtain Informed consent      4-Conduct Subject visits      6-Lab Studies review      8-Data Collection      9-Other-describe

Appendix 3

PREMOD2 – NIRS Sub-study

Background

Early hemodynamic effects (within 3 hours of life) of Delayed Cord Clamping compared to Umbilical Cord Milking are still unknown. Four sites experienced in the use of NIRS and who have appropriate data collection equipment in the delivery room (Alberta, Ulm, Cork and San Diego) will obtain and report the physiological changes with UCM and DCC from birth until 24 hours of life. This data will yield the largest available sample of continuously recorded heart rate, cerebral tissue oxygenation, peripheral oxygen saturation, airway pressure, and administered FiO<sub>2</sub> to delineate the short term responses to two methods of placental transfusion. In our initial trial we demonstrated increased blood pressure from 3-15 HOL with UCM compared to DCC in premature newborns <32 weeks, but did not show any differences in cerebral oxygenation.

Hypotheses

- Infants in the UCM group will have increased cerebral StO<sub>2</sub> within the first 10 minutes of life compared to infants in the DCC group.
- Infants in the UCM group will have increased cerebral StO<sub>2</sub> in the first 24 hours of life compared to infants in the DCC group.

Methodology

This sub-study will include 400 infants <28 weeks GA enrolled in the PREMOD2 trial. Once the newborn has been delivered, received the intervention (UCM or DCC), and been placed on the resuscitation bed, ECG electrodes, a NIRS sensor and a pulse oximeter will be placed within 60 seconds. While arterial saturation and heart rate data will be available to the clinical team, data from NIRS will be blinded. Data on all study infants will be recorded for at least the first 10 minutes in the delivery room, and then for 24 hours in the NICU. Heart rate, oxygen saturations, and cerebral oxygenation, will be downloaded as per each site's practice for neonatal resuscitation.

Statistics/Power

A recently completed trial (N=127) by our group demonstrated that premature infants <32 weeks that developed severe IVH or early death (first 72 hours) had a NIRS value of 60 +/-6 at 10 minutes of life. Infants who developed IVH/death were all less than 28 weeks. An ROC curve demonstrated that a NIRS average of <66 between 7-10 minutes predicted severe IVH death with a sensitivity and specificity of 88 and 86 percent respectively (see figure below, AUC=0.94, p<0.001). A sample size of 400 (n=200 in each arm) would be able to detect a conservative 3 percent difference between groups with a power of 0.86 and an alpha of 0.05.

1071 Manuscript

1072 This data will be used to publish the hemodynamic/cerebral effects of cord milking compared to  
1073 delayed cord clamping. This data will also be used to predict which infants are at risk for  
1074 developing severe IVH and early death (first week of life).

1075

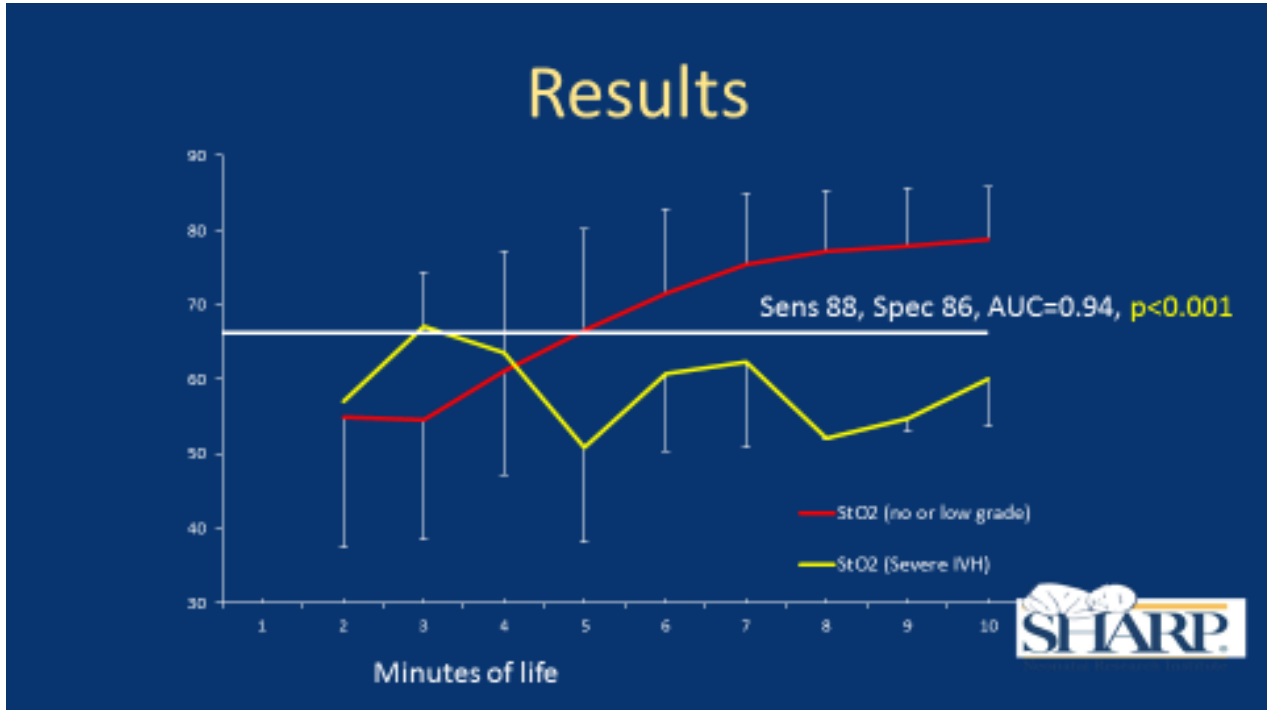

1076

1077

1078

1079

1080  
1081  
1082  
1083  
1084  
1085  
1086  
1087  
1088  
1089  
1090  
1091  
1092  
1093  
1094  
1095  
1096  
1097  
1098  
1099  
1100  
1101  
1102  
1103  
1104  
1105  
1106  
1107  
1108  
1109  
1110  
1111  
1112  
1113  
1114  
1115  
1116  
1117  
1118  
1119  
1120  
1121

Appendix 4

Here is the summary of changes shown in the boxes below in reverse chronological order.

**Version 1.7 May 15, 2018**

I. This protocol has been updated with additional NCT numbers for the sub-study & FU, exclusion for parents who request no resuscitation, a change & clarification of deviation reporting, and addition of maternal level of education data which was recommended by the DSMB Chair.

**Version 1.6 January 03, 2018**

I. This protocol amendment addresses infants in the inclusion GA who are not eligible to be randomized. Data Collection for these infants will not include any HIPPA protected privileged information and can be obtained from the institution's VON Database, pg 21.

II. Updates to Site Participation and clean up of text to match current Manual of Operations.

**Version 1.5 August 25, 2017**

I. Protocol exclusion criteria deleted throughout text and tables

- Maternal HIV, Hepatitis B and C

**Version 1.4 June 1, 2017**

I. Protocol Deviation Reporting redefined, pg 23

II. Appendix I Data Collection deleted #12 uterine massage and added uterotonic meds to include Cytotec and Hemabate post delivery

**Version 1.3 May 1, 2017**

The following edits have been made after review for consistency, clarification of language and, updates to sub-study and data management. DSMB members and Sub-site personnel updated.

I. Participating site update (removed University of Utah)

**II. NIRS Sub-study**

- Sub-study will monitor NIRS for first 24 hours of life (*change from 72*)
- Subset of 400 subjects < 28 weeks gestational age

**III. Aim 2**

- Distinct separation made between Hypothesis 3 & 4, safety data (resuscitation interventions and labs) vs. NIRS sub-study

**IV. List of Abbreviations**

- BSID- Bayley Scales of Infant and Toddler Development, Edition 3 (*added*)
- DSMB- Data and Safety Monitoring Board (*change from Committee*)

**V. Methodology**

- Blinding- Clarification of procedure blinding

**VI. Data Collection**

- Upon enrollment, initial randomization and allocation should be entered into the eDES within 72 hours (*change from 48*)

**VII. Expected Adverse Events**

- Defined polycythemia with Hematocrit > 65% in first 7 days of life

**VIII. Time period of Serious Adverse Events defined (first 7 days of life)**

- Polycythemia with Hematocrit > 65% requiring treatment in first 7 days of life

|      |                                                                                                                                                                                                                                                                                                                                                                                                                                                                                                                                                   |
|------|---------------------------------------------------------------------------------------------------------------------------------------------------------------------------------------------------------------------------------------------------------------------------------------------------------------------------------------------------------------------------------------------------------------------------------------------------------------------------------------------------------------------------------------------------|
| 1122 | <ul style="list-style-type: none"> <li>• Hyperbilirubinemia requiring exchange transfusion during <i>first 7 days of life</i></li> <li>• Serious <u>unexpected</u> problems will be reported within 72 hours of discovery (<i>was 7 days</i>)</li> </ul>                                                                                                                                                                                                                                                                                          |
| 1123 |                                                                                                                                                                                                                                                                                                                                                                                                                                                                                                                                                   |
| 1124 |                                                                                                                                                                                                                                                                                                                                                                                                                                                                                                                                                   |
| 1125 | <b>IX. Protocol Deviations</b>                                                                                                                                                                                                                                                                                                                                                                                                                                                                                                                    |
| 1126 | <ul style="list-style-type: none"> <li>• Deviations will be entered into the eDES system Deviation Log concurrently</li> </ul>                                                                                                                                                                                                                                                                                                                                                                                                                    |
| 1127 | <b>X. Appendix 1</b>                                                                                                                                                                                                                                                                                                                                                                                                                                                                                                                              |
| 1128 | <ul style="list-style-type: none"> <li>• Worst BE on blood gas within 1 hour of life (<i>added</i>)</li> </ul>                                                                                                                                                                                                                                                                                                                                                                                                                                    |
| 1129 | <b>XI. Appendix 3</b>                                                                                                                                                                                                                                                                                                                                                                                                                                                                                                                             |
| 1130 | <ul style="list-style-type: none"> <li>• NIRS Sub-study Protocol (<i>added</i>)</li> </ul>                                                                                                                                                                                                                                                                                                                                                                                                                                                        |
| 1131 | <b><u>Version 1.2 March 1, 2017</u></b>                                                                                                                                                                                                                                                                                                                                                                                                                                                                                                           |
| 1132 | The following edits have been made after review with all Investigators for consistency,                                                                                                                                                                                                                                                                                                                                                                                                                                                           |
| 1133 | clarification of language, hypothesis 3 & 4 and, additional data collection of safety -parameters.                                                                                                                                                                                                                                                                                                                                                                                                                                                |
| 1134 | I. Added participating center University of Utah                                                                                                                                                                                                                                                                                                                                                                                                                                                                                                  |
| 1135 | II. Hypothesis 3, clarified NIRS sub-study                                                                                                                                                                                                                                                                                                                                                                                                                                                                                                        |
| 1136 | III. Hypothesis 4, edited for Long Term outcomes only. Deleted immediate and                                                                                                                                                                                                                                                                                                                                                                                                                                                                      |
| 1137 | delivery room interventions                                                                                                                                                                                                                                                                                                                                                                                                                                                                                                                       |
| 1138 | IV. Expected Adverse events, added ROP                                                                                                                                                                                                                                                                                                                                                                                                                                                                                                            |
| 1139 | <b><u>Version 1.1 December 14, 2016</u></b>                                                                                                                                                                                                                                                                                                                                                                                                                                                                                                       |
| 1140 | The following edits have been made after review with all Investigators for consistency,                                                                                                                                                                                                                                                                                                                                                                                                                                                           |
| 1141 | clarification of inclusion/exclusion criteria and additional data collection of safety parameters.                                                                                                                                                                                                                                                                                                                                                                                                                                                |
| 1142 | <b>I. Inclusion Criteria</b>                                                                                                                                                                                                                                                                                                                                                                                                                                                                                                                      |
| 1143 | Throughout document “Multiples (unless <u>TTT</u> )” was changed to “Multiples unless                                                                                                                                                                                                                                                                                                                                                                                                                                                             |
| 1144 | <u>monochorionic</u> ”.                                                                                                                                                                                                                                                                                                                                                                                                                                                                                                                           |
| 1145 | <b>II. Exclusion Criteria</b>                                                                                                                                                                                                                                                                                                                                                                                                                                                                                                                     |
| 1146 | Throughout document in Tables and text                                                                                                                                                                                                                                                                                                                                                                                                                                                                                                            |
| 1147 | <ul style="list-style-type: none"> <li>• Placenta abruption (<i>was clarified</i>) with <u>significant bleeding</u>, cutting through the placenta (Note: <u>Partial abruptions are not excluded</u>)</li> <li>• Cord prolapse (<i>added</i>)</li> <li>• Hydrops (<i>added</i>)</li> <li>• Bleeding Accreta (<i>added</i>)</li> </ul>                                                                                                                                                                                                              |
| 1148 |                                                                                                                                                                                                                                                                                                                                                                                                                                                                                                                                                   |
| 1149 |                                                                                                                                                                                                                                                                                                                                                                                                                                                                                                                                                   |
| 1150 |                                                                                                                                                                                                                                                                                                                                                                                                                                                                                                                                                   |
| 1151 |                                                                                                                                                                                                                                                                                                                                                                                                                                                                                                                                                   |
| 1152 | <b>III. Secondary Endpoints and Outcomes</b> (Edits on pages 5 and 19)                                                                                                                                                                                                                                                                                                                                                                                                                                                                            |
| 1153 | Deleted “See Appendix 1 for safety and efficacy data” and added for clarification:                                                                                                                                                                                                                                                                                                                                                                                                                                                                |
| 1154 | <ul style="list-style-type: none"> <li>• Incidence of death or neurodevelopmental impairment at 22-26 months corrected gestational age</li> <li>• All Grade Intraventricular Hemorrhage</li> <li>• Severe IVH (Grade 3 or 4)</li> <li>• Hemoglobin/Hematocrit at 4 hours (infant)</li> <li>• Incidence of Severe IVH or death in infants &lt;28 weeks gestation</li> <li>• Cerebral StO2 during Resuscitation</li> <li>• Cerebral StO2 in the NICU</li> <li>• Other exploratory and safety secondary outcomes are listed in Appendix 1</li> </ul> |
| 1155 |                                                                                                                                                                                                                                                                                                                                                                                                                                                                                                                                                   |
| 1156 |                                                                                                                                                                                                                                                                                                                                                                                                                                                                                                                                                   |
| 1157 |                                                                                                                                                                                                                                                                                                                                                                                                                                                                                                                                                   |
| 1158 |                                                                                                                                                                                                                                                                                                                                                                                                                                                                                                                                                   |
| 1159 |                                                                                                                                                                                                                                                                                                                                                                                                                                                                                                                                                   |
| 1160 |                                                                                                                                                                                                                                                                                                                                                                                                                                                                                                                                                   |
| 1161 |                                                                                                                                                                                                                                                                                                                                                                                                                                                                                                                                                   |
| 1162 |                                                                                                                                                                                                                                                                                                                                                                                                                                                                                                                                                   |
| 1163 | <b>IV. Randomization, Stratification, Allocation</b> (Added to page 18)                                                                                                                                                                                                                                                                                                                                                                                                                                                                           |
| 1164 | “There is no crossover allowed between UCM and DCC groups, subjects should                                                                                                                                                                                                                                                                                                                                                                                                                                                                        |
| 1165 | receive their randomized treatment. If the physician abandons the procedure for the                                                                                                                                                                                                                                                                                                                                                                                                                                                               |

1166 safety of the mother or infant, they should receive only immediate cord clamping i.e.  
1167 do not milk the cord if randomized to DCC.”

1168 **V. Serious Adverse Events** (Clarified on page 26)

- 1169 • Death (Maternal or neonatal)

1170 **VI. Appendix 1**

1171 **Deleted:**

1172 Hemoglobin prior to delivery  
1173 Hemoglobin post-delivery (if available)  
1174 Estimated Blood loss at delivery

1175 **Added:**

1176 Uterine massage (yes/no/unknown)  
1177 Indication for Delivery  
1178 Presentation (vertex, breech, transverse)  
1179 Maternal Hospitalization/Readmit within 10 days  
1180 Maternal Length of Stay  
1181 Maternal Death  
1182 SGA (<10%)  
1183 Added BE to cord gas

1184

1185
