# Supplementary material
Source: PubMed Central journal article supplement (PMC6865839)
Supplement: jama-322-1877-s002.pdf [file jama-322-1877-s002.pdf]

1  
2  
3  
4  
5  
6  
7  
8  
9  
10  
11  
12  
13  
14  
15  
16  
17  
18  
19  
20  
21  
22  
23  
24

**Premature Infants Receiving Milking or  
Delayed Cord Clamping: Randomized  
Controlled Multicenter Non-Inferiority Trial  
(PREMOD2)**

**Statistical Analysis Plan (v1)**

*Prepared by*  
**Data Coordinating Center (UAB SOPH)**

**August 25, 2017**

## 1. Introduction

Extremely premature infants can experience severe bleeding in the brain, or severe intraventricular hemorrhage (IVH) which usually occurs within 72 hours after birth. Approximately 65% of all severe IVH are in infants < 28 weeks gestation, though only 1-2% of overall births are at this gestation. This has significant public health implications, by causing increased death and long-term morbidities in this high risk population. The study intervention is poised to understand if we can reduce this burden, and the trial will provide data on a not yet established therapy. If the strategy is indeed successful, potential benefits for preterm infants are life-long. Our multicenter study will test the research hypothesis that umbilical cord milking is not inferior to delayed cord clamping in premature newborns.

## 2. Descriptive Statistics

Patient characteristics at randomization will be summarized by randomization group. The two study groups will be labeled as UCM (for Umbilical Cord Milking) and DCC (for Delayed Cord Clamping). For continuous variables, means/medians and standard deviations/interquartile ranges will be reported. To assess and/or identify covariates for which adjusted sensitivity analyses might be conducted, Student t-tests will be used to compare means between study groups. Where appropriate, medians and quartiles will be reported and the Wilcoxon rank sum test will be used as an alternative comparison procedure. Categorical measures will be presented as counts and percentages and will be compared using the  $\chi^2$  tests of association to identify potential group differences. For rare outcomes such that the  $\chi^2$  test of association is not appropriate, Fisher's exact test will be used. Balance overall is expected because of the large sample size and we expect approximately 5% to be different by chance, since we are not adjusting these baseline comparisons for multiple testing. Any group characteristics that are identified as statistically significantly different between the two groups at a 0.05 level of significance will be considered as covariates in multivariable models in subsequent analyses of the primary study outcome.

## 3. Primary Analysis

**3.1. Primary Outcome:** The primary endpoint to be used for efficacy evaluation is the rate of severe IVH (grade 3 or 4) and/or death. The occurrence of 1 or more of these items will be considered an occurrence of the primary study outcome.

**3.2. Analysis Plan:** The primary hypothesis to be tested is whether the UCM group results in a non-inferior event rate compared to the DCC group. The non-inferiority margin is set at 1% (0.01). The null hypothesis for the formal statistical test is that UCM is inferior to DCC with a 1% non-inferiority margin. That is, the difference in primary outcome rates,  $p_{UCM} - p_{DCC}$ , is 1% or higher. The alternative hypothesis is that UCM is not inferior. That is, the true difference in rates ( $p_{UCM} - p_{DCC}$ ) is less than 1%. This will be tested based on a 1-sided confidence interval for the true difference in rates ( $p_{UCM} - p_{DCC}$ ). If the upper bound of this confidence interval is completely below 1%, then non-inferiority of UCM will be established.

Although the difference in proportions is used for sample size calculations below, rates in the two study groups will be additionally evaluated in logistic regression models. These models will allow for control of covariates as well as investigation of effect modification. Potential covariates include gender, gestational age, maternal corticosteroid use, chorioamnionitis, preeclampsia, and small for gestational age.<sup>1-4</sup> As randomization is stratified by gestational age (GA), stratified analyses will be conducted in early preterm and late preterm infants. Differential consent practices at sites (antenatal vs. postnatal) may also skew subject acuity/gestation or maternal complications. Clinical site will be used as a stratifying factor to control for any confounding by site through residual, site-level treatment imbalance. Standard regression diagnostics will be used to assess model adequacy and to examine for potential outlying or

75 influential data points. As sensitivity analyses, generalized estimating equations (GEE) will be used to  
76 model outcomes while accounting for any clustering effects resulting from multiple gestations.

77 Both intent-to-treat and per-protocol analyses will be conducted. Since in a non-inferiority trial  
78 an intention to treat analysis biases away from the null, in the per protocol analysis, the covariate of the  
79 ordinal scale of the quality of the manipulation for UCM or DCC will be included. If non-inferiority is  
80 established by rejecting that the outcome event rate is worse by 1% or more in the UCM group, then  
81 superiority will be tested at the 5% level following FDA guidelines. For all superiority testing, the  
82 intention to treat analysis will be utilized with a per protocol analysis as a sensitivity analysis.

83 Prior studies offer no basis for assuming a priori interactions between treatment groups, strata and  
84 subgroups defined by sex, race/ethnicity, gestational age, site or a combination of these groups, beyond  
85 that already controlled for in the randomization. For that reason, preplanned tests for interactions with  
86 treatment assignment are not warranted, and are not powered for with the sample size. We propose to  
87 table all results by subgroups for descriptive purposes and to explore in secondary analyses possible  
88 subgroup differences by treatment group, solely for purposes of establishing consistency and/or  
89 generating hypotheses for future studies.

90  
91 **3.3. Sample Size and Power:** The initial pilot study of 154 newborns delivered by C/S was recently  
92 completed to determine the feasibility and efficacy of this study and revealed a 6 percent difference in the  
93 combined outcomes of severe IVH/death between newborns treated with UCM and DCC (4.1 vs. 10.1  
94 percent, respectively). The pilot study was mainly conducted at SMBHWN. However, since severe IVH  
95 rates and death may vary from center to center, SMBHWN compared their data to the most recent  
96 Vermont Oxford Network (VON) data (over 900 NICUs). For 2015, SMBHWN center had a severe IVH  
97 or death rate of 16 percent, close to the 50<sup>th</sup> percentile for the VON network. However, this includes very  
98 high risk-babies who would have been excluded from the trial (e.g., di-amniotic monochorionic twins,  
99 placental abruptions, hydrops, and congenital anomalies which have a higher IVH/mortality risk. This  
100 likely explains why the Phase 1 pilot PREMOD study had a lower composite number of severe IVH  
101 and/or death (10.1 percent vs. 4.1 percent, DCC and UCM respectively). We anticipate UCM and DCC  
102 subjects in this trial would have a similar incidence of this outcome.

103 The sample size for non-inferiority testing for infants born by C/S in each group is 502 (overall  
104 sample 1500), a two-group large-sample normal approximation test of proportions with a one-sided 0.05  
105 significance level will have 90% power to reject the null hypothesis that the UCM is inferior to DCC (the  
106 difference in proportions,  $p_{UCM} - p_{DCC}$ , is 0.01 or higher, a 1% non-inferiority margin) in favor of the  
107 alternative hypothesis that the proportions in the two groups are not inferior, assuming that the expected  
108 difference in proportions is -0.04 and the proportion in the DCC group is 0.10. (Note using 0.101 yields  
109 485, so we round the proportion difference down to be conservative).

110 Further, to show the sample size for C/S is adequate we examined the power to detect the  
111 difference between 0.10 for the DCC group and 0.04 for the UCM arm with 502 newborns per group. A  
112 two group  $\chi^2$  test with a 0.05 one-sided significance level will have 98% power to detect the difference  
113 between the DCC group proportion,  $p_{DCC}$ , of 0.10 and the UCM group proportion,  $p_{UCM}$ , of 0.04 (odds  
114 ratio of 0.375) when the sample size in each group is 502 and 75% power to show superiority, if the rate  
115 is 0.06. Both non-inferiority and superiority will use the same sample and will have the ability to test two  
116 hypotheses in a systematic manner for each aim.

117  
118 **3.4. Interim Monitoring:** The study will be closely monitored for issues of data quality, study conduct,  
119 adherence to the prescribed treatment procedures, data quality, and adverse events. Reports including  
120 adverse events, serious adverse events, and primary outcomes will be distributed twice annually and  
121 reviewed by the DSMB. All reports will present information in masked format to prevent unblinding.

122 Interim analyses will be conducted at the discretion of the DSMB. As a non-inferiority trial, we  
123 are unlikely to demonstrate non-inferiority before reaching the target sample size. Early study  
124 termination would likely be the result of unexpected safety concerns and not efficacy. Early stopping  
125 based on inferior safety must be based largely on descriptive data and close examination of adverse

126 events. Given the projected number of subjects, early stopping is unlikely unless the observed effect of  
127 UCM is substantially worse than DCC or there are unexpected adverse results potentially seen. With 500  
128 subjects per group at a second early stopping review (n=1000), and assuming that the UCM Group is  
129 actually no worse than DCC, observed risk in the experimental group would have to be at most 0.5 (risk  
130 of death and IVH) to have 80% power to show non-inferior efficacy (with  $\alpha = 0.012$ ). To justify stopping  
131 for non-inferior efficacy and superior safety again will require a substantial observed improvement in the  
132 experimental arm at the second early stopping time. Additional analyses will be presented to the DSMB  
133 to ensure consistency over and above an appropriate p-value for termination.

#### 134 135 **4. Secondary Analyses**

136  
137 Secondary outcomes will be analyzed using similar procedures to the primary outcome.  
138 Comparisons between treatment groups will use logistic regression (dichotomous outcomes), linear  
139 regression (continuous outcomes), or survival analysis (survival time outcomes, such as time to discharge,  
140 etc.), as appropriate. Differential practices at sites (criteria for phototherapy or blood transfusions) may  
141 also skew these secondary outcomes. Therefore, the clinical site will be used as a stratifying factor to  
142 control for any confounding by site through residual, site-level treatment imbalance. Neurodevelopmental  
143 follow-up results will be assessed using ANCOVA models with covariates used for analyses of the  
144 primary outcome. BSID-III scaled and composite cognitive, language and motor scores may be compared.

#### 145 146 **References**

- 147 1. Mercer JS, Erickson-Owens DA, Vohr BR, et al. Effects of Placental Transfusion on Neonatal  
148 and 18 Month Outcomes in Preterm Infants: A Randomized Controlled Trial. *The Journal of*  
149 *Pediatrics* 2016;168:50-5.e1.
- 150 2. Linder N, Haskin O, Levit O, et al. Risk factors for intraventricular hemorrhage in very low birth  
151 weight premature infants: a retrospective case-control study. *Pediatrics* 2003;111:e590-5.
- 152 3. Salafia CM, Minior VK, Rosenkrantz TS, et al. Maternal, placental, and neonatal associations  
153 with early germinal matrix/intraventricular hemorrhage in infants born before 32 weeks'  
154 gestation. *American journal of Perinatology* 1995;12:429-36.
- 155 4. Ment LR, Oh W, Philip AG, et al. Risk factors for early intraventricular hemorrhage in low birth  
156 weight infants. *The Journal of Pediatrics* 1992;121:776-83.

157  
158  
159
