# Supplementary material
Source: PubMed Central journal article supplement (PMC6865839)
Supplement: jama-322-1877-s003.pdf [file jama-322-1877-s003.pdf]

## Supplementary Online Content

Katheria A, Reister F, Essers J, et al. Association of umbilical cord milking vs delayed umbilical cord clamping with death or severe intraventricular hemorrhage among preterm infants. *JAMA*. doi:10.1001/jama.2019.16004

**eFigure.** Predicted probabilities (95% confidence intervals) as a function of birth gestational age from an adjusted logistic regression for severe IVH, stratified by treatment group and maternal chorioamnionitis status

**eTable 1.** Treatment group (UCM vs. DCC) effect estimates on primary outcomes from several generalized estimating equation (GEE) models accounting for clustering within sites

**eTable 2.** Treatment group (UCM vs. DCC) effect estimates on primary outcomes from several generalized estimating equation (GEE) models accounting for clustering due to multiple births

This supplementary material has been provided by the authors to give readers additional information about their work.

**eFigure.** Predicted probabilities (95% confidence intervals) as a function of birth gestational age from an adjusted logistic regression for severe IVH, stratified by treatment group and maternal chorioamnionitis status

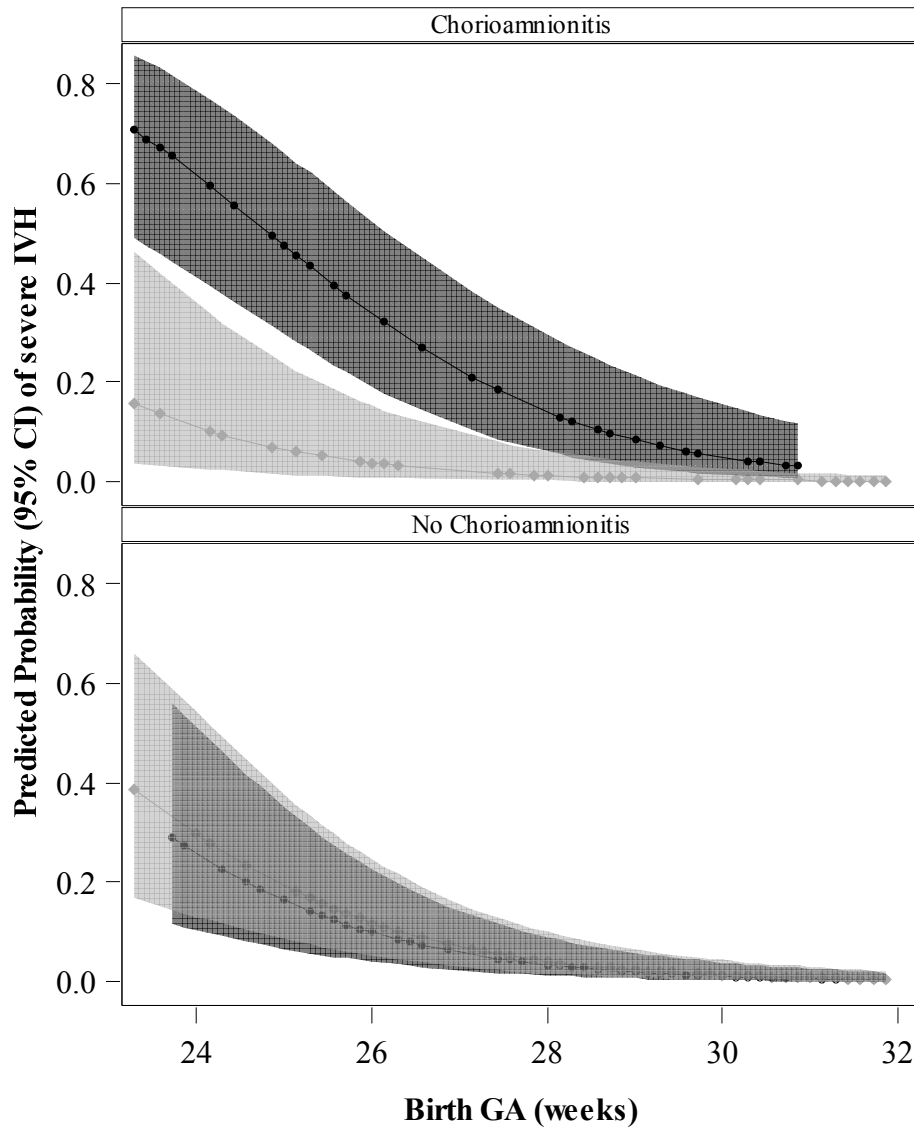

The umbilical cord milking group is displayed in black, while the delayed cord clamping group is displayed in gray.

**eTable 1.** Treatment group (UCM vs. DCC) effect estimates on primary outcomes from several generalized estimating equation (GEE) models accounting for clustering within sites

| Primary Outcome            | Model†                                               | RR Estimate (95% CI) | p-value |
|----------------------------|------------------------------------------------------|----------------------|---------|
| <b>Severe IVH or Death</b> | Treatment Group (unadjusted)                         | 1.49 (0.89, 2.47)    | 0.13    |
|                            | Treatment Group + GA Strata                          | 1.44 (0.87, 2.38)    | 0.15    |
|                            | Treatment Group + GA Strata + Infant Gender          | 1.50 (0.96, 2.35)    | 0.08    |
|                            | Treatment Group + GA Strata + Infant Gender + Chorio | 1.60 (1.00, 2.58)    | 0.05    |
| <b>Severe IVH</b>          | Treatment Group (unadjusted)                         | 2.53 (1.36, 4.73)    | 0.003   |
|                            | Treatment Group + GA Strata                          | 2.53 (1.31, 4.91)    | 0.006   |
|                            | Treatment Group + GA Strata + Infant Gender          | 2.61 (1.51, 4.53)    | <0.001  |
|                            | Treatment Group + GA Strata + Infant Gender + Chorio | 2.86 (1.58, 5.18)    | <0.001  |
| <b>Infant Death</b>        | Treatment Group (unadjusted)                         | 1.15 (0.47, 2.83)    | 0.76    |
|                            | Treatment Group + GA Strata                          | 1.10 (0.45, 2.66)    | 0.84    |
|                            | Treatment Group + GA Strata + Infant Gender          | 1.11 (0.47, 2.64)    | 0.81    |
|                            | Treatment Group + GA Strata + Infant Gender + Chorio | 1.21 (0.50, 2.89)    | 0.68    |

A compound symmetric correlation structure is assumed in all GEE models.

† The first row for each primary outcome pertains to the unadjusted treatment group effect on the outcome. The second row for each outcome pertains to a model including treatment group and GA strata as independent variables with no interactions. The third row for each outcome pertains to a model including treatment group, GA strata, and infant gender as independent variables with no interactions. The fourth row for each outcome pertains to a model including treatment group, GA strata, infant gender, and maternal chorioamnionitis as independent variables with no interactions.

**eTable 2.** Treatment group (UCM vs. DCC) effect estimates on primary outcomes from several generalized estimating equation (GEE) models accounting for clustering due to multiple births

| Primary Outcome            | Model†                                               | RR Estimate (95% CI) | p-value |
|----------------------------|------------------------------------------------------|----------------------|---------|
| <b>Severe IVH or Death</b> | Treatment Group (unadjusted)                         | 1.50 (0.86, 2.61)    | 0.15    |
|                            | Treatment Group + GA Strata                          | 1.42 (0.85, 2.39)    | 0.19    |
|                            | Treatment Group + GA Strata + Infant Gender          | 1.46 (0.88, 2.44)    | 0.15    |
|                            | Treatment Group + GA Strata + Infant Gender + Chorio | 1.57 (0.96, 2.57)    | 0.07    |
| <b>Severe IVH</b>          | Treatment Group (unadjusted)                         | 2.52 (1.14, 5.60)    | 0.02    |
|                            | Treatment Group + GA Strata                          | 2.51 (1.16, 5.41)    | 0.02    |
|                            | Treatment Group + GA Strata + Infant Gender          | 2.56 (1.21, 5.42)    | 0.01    |
|                            | Treatment Group + GA Strata + Infant Gender + Chorio | 2.80 (1.33, 5.87)    | 0.007   |
| <b>Infant Death</b>        | Treatment Group (unadjusted)                         | 1.15 (0.58, 2.27)    | 0.70    |
|                            | Treatment Group + GA Strata                          | 1.08 (0.55, 2.11)    | 0.82    |
|                            | Treatment Group + GA Strata + Infant Gender          | 1.09 (0.56, 2.13)    | 0.80    |
|                            | Treatment Group + GA Strata + Infant Gender + Chorio | 1.19 (0.62, 2.27)    | 0.60    |

A compound symmetric correlation structure is assumed in all GEE models.

† The first row for each primary outcome pertains to the unadjusted treatment group effect on the outcome. The second row for each outcome pertains to a model including treatment group and GA strata as independent variables with no interactions. The third row for each outcome pertains to a model including treatment group, GA strata, and infant gender as independent variables with no interactions. The fourth row for each outcome pertains to a model including treatment group, GA strata, infant gender, and maternal chorioamnionitis as independent variables with no interactions.
