# Supplementary material
Source: PubMed Central journal article supplement (PMC6865839)
Supplement: jama-322-1877-s004.pdf [file jama-322-1877-s004.pdf]

# Data Sharing Statement

Katheria. Association of Umbilical Cord Milking vs Delayed Umbilical Cord Clamping With Death or Severe Intraventricular Hemorrhage Among Preterm Infants. *JAMA*. Published November 19, 2019. 10.1001/jama.2019.16004

## Data

**Data available:** Yes

**Data types:** Deidentified participant data

**How to access data:** [jszychow@uab.edu](mailto:jszychow@uab.edu)

**When available:** With publication

## Supporting Documents

**Document types:** Informed consent form

**How to access documents:** [jszychow@uab.edu](mailto:jszychow@uab.edu)

**When available:** With publication

## Additional Information

**Who can access the data:** researchers whose proposed use of the data has been approved

**Types of analyses:** for a specified purpose

**Mechanisms of data availability:** signed data access agreement
